# Supplementary material for: Rationalizing the influence of α-cationic phospholes on π-catalysis
Source: Royal Society of Chemistry journal article supplement (doi:10.1039/d1dt03721h), 2021-01-01
Supplement: d1dt03721h1.pdf [file d1dt03721h1.pdf]

**Electronic Supplementary Information belonging to the manuscript:**

## **Rationalizing the influence of $\alpha$ -cationic phospholes on $\pi$ - catalysis**

*Iván Cortés,<sup>a,b</sup> Jorge Juan Cabrera-Trujillo,<sup>b</sup> and Israel Fernández<sup>\*b</sup>*

a. Instituto de Química Rosario (IQUIR, CONICET-UNR), Facultad de Ciencias Bioquímicas y Farmacéuticas and Universidad Nacional de Rosario, Suipacha 531, 2000 Rosario (Argentina).

b. Departamento de Química Orgánica I and Centro de Innovación en Química Avanzada (ORFEO-CINQA), Facultad de Ciencias Químicas, Universidad Complutense de Madrid, 28040 Madrid (Spain).

[israel@quim.ucm.es](mailto:israel@quim.ucm.es)

### **Contents:**

|                                            |    |
|--------------------------------------------|----|
| 1. Figure S1.....                          | S2 |
| 2. Cartesian coordinates and energies..... | S3 |

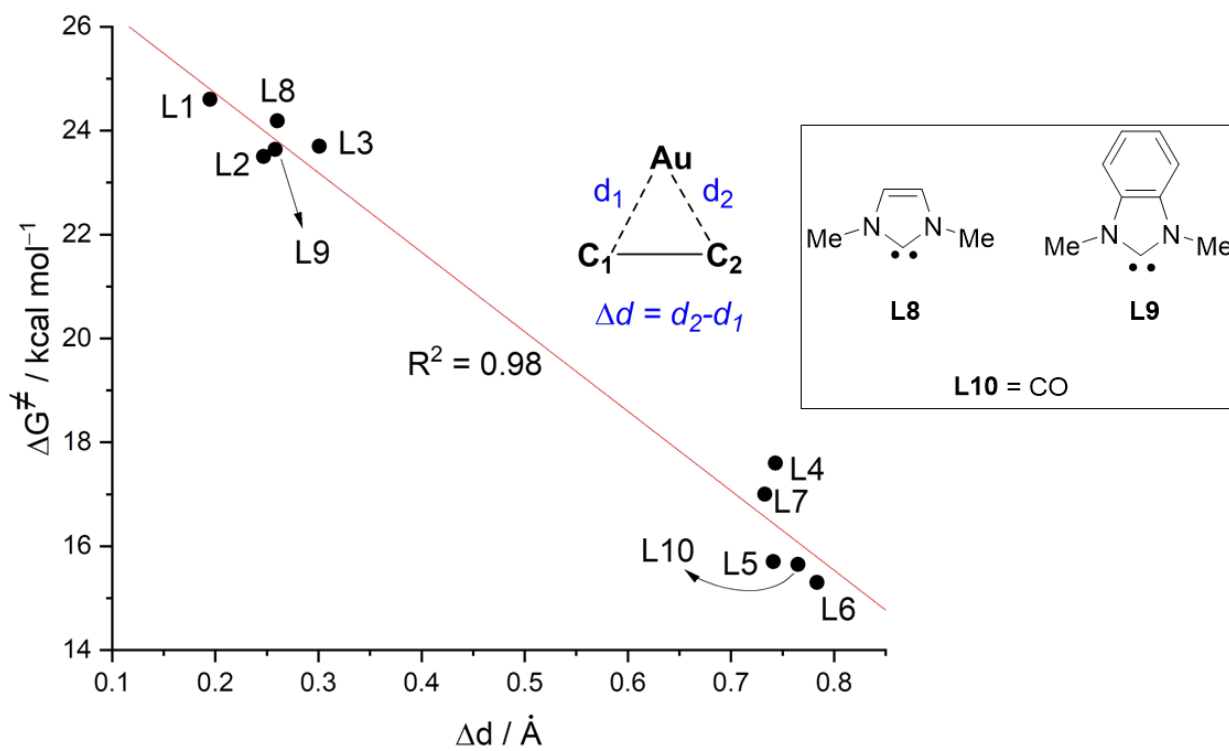

**Figure S1.** Plot of the geometrical parameter  $\Delta d$  versus the computed free activation barriers. All data have been computed at the PCM(CH<sub>2</sub>Cl<sub>2</sub>)-B3LYP-D3/def2-TZVPP//B3LYP-D3/def2-SVP level. For the definition of ligands **L1-L7** see main text.

Cartesian coordinates (in Å), electronic and free energies (in a.u.) of all the stationary points discussed in the text. All calculations have been performed at the PCM(dichloromethane)/B3LYP-D3/def2-TZVPP//B3LYP-D3/def2-SVP level.

**Mesitylene:**

E = -350.350693

G = -350.389305

|   |              |              |              |
|---|--------------|--------------|--------------|
| C | -0.020838000 | -1.412170000 | 0.000193000  |
| C | -1.217317000 | -0.672938000 | 0.001090000  |
| C | 1.191589000  | -0.717732000 | -0.001012000 |
| H | -2.173507000 | -1.206205000 | 0.001957000  |
| H | 2.131486000  | -1.279185000 | -0.001813000 |
| C | -1.212546000 | 0.724263000  | 0.000583000  |
| C | 1.233506000  | 0.688124000  | -0.001133000 |
| C | 0.025809000  | 1.390966000  | -0.000478000 |
| H | 0.041860000  | 2.485687000  | -0.000780000 |
| C | -0.064838000 | -2.921508000 | 0.000010000  |
| H | 0.944165000  | -3.359872000 | 0.002835000  |
| H | -0.602257000 | -3.304157000 | 0.884086000  |
| H | -0.597081000 | -3.304014000 | -0.887293000 |
| C | -2.497890000 | 1.516693000  | -0.000303000 |
| H | -3.381713000 | 0.861717000  | 0.012950000  |
| H | -2.556381000 | 2.181716000  | 0.877797000  |
| H | -2.567847000 | 2.160486000  | -0.893399000 |
| C | 2.562649000  | 1.404510000  | 0.000723000  |
| H | 2.438198000  | 2.497337000  | -0.023117000 |
| H | 3.149566000  | 1.151100000  | 0.899816000  |
| H | 3.172772000  | 1.114146000  | -0.871082000 |

**[L1-Au-phenylacetylene]<sup>+</sup>:**

E = -1480.855779

G = -1480.921478

|    |              |              |              |
|----|--------------|--------------|--------------|
| C  | -2.235895000 | -2.878963000 | -0.236867000 |
| C  | -2.982049000 | -1.890937000 | -0.160411000 |
| Au | -0.614324000 | -1.346539000 | -0.091946000 |
| P  | 1.169503000  | 0.148367000  | 0.021363000  |
| H  | -1.980250000 | -3.925827000 | -0.340518000 |
| C  | 1.807040000  | 0.335829000  | 1.718897000  |
| C  | 2.171932000  | 1.594008000  | 2.225094000  |
| C  | 1.976971000  | -0.815560000 | 2.507253000  |
| C  | 2.708352000  | 1.693784000  | 3.512054000  |
| C  | 2.517652000  | -0.707950000 | 3.789361000  |
| C  | 2.883286000  | 0.546372000  | 4.292018000  |
| H  | 2.036789000  | 2.493894000  | 1.621209000  |
| H  | 1.688014000  | -1.796938000 | 2.120013000  |
| H  | 2.989832000  | 2.673095000  | 3.906060000  |
| H  | 2.650156000  | -1.603976000 | 4.400026000  |
| H  | 3.302052000  | 0.629270000  | 5.297674000  |
| C  | 0.618475000  | 1.797471000  | -0.540563000 |
| C  | -0.672630000 | 2.242510000  | -0.204448000 |
| C  | 1.478099000  | 2.633198000  | -1.272175000 |
| C  | -1.093496000 | 3.515545000  | -0.590645000 |
| C  | 1.047838000  | 3.906341000  | -1.657627000 |
| C  | -0.234225000 | 4.348219000  | -1.317181000 |

|   |              |              |              |
|---|--------------|--------------|--------------|
| H | -1.355216000 | 1.595272000  | 0.353696000  |
| H | 2.479108000  | 2.292159000  | -1.545395000 |
| H | -2.097901000 | 3.856123000  | -0.328884000 |
| H | 1.717736000  | 4.553472000  | -2.228402000 |
| H | -0.567579000 | 5.342797000  | -1.622813000 |
| C | 2.572278000  | -0.339802000 | -1.033617000 |
| C | 2.307022000  | -0.829560000 | -2.324685000 |
| C | 3.898687000  | -0.199800000 | -0.594899000 |
| C | 3.362773000  | -1.166963000 | -3.172099000 |
| C | 4.950755000  | -0.544627000 | -1.448739000 |
| C | 4.685015000  | -1.025308000 | -2.734234000 |
| H | 1.275146000  | -0.947145000 | -2.667917000 |
| H | 4.113337000  | 0.173011000  | 0.408826000  |
| H | 3.154495000  | -1.546818000 | -4.174891000 |
| H | 5.982274000  | -0.438313000 | -1.105335000 |
| H | 5.510518000  | -1.295524000 | -3.396960000 |
| C | -3.818956000 | -0.739827000 | -0.063885000 |
| C | -4.342433000 | -0.352503000 | 1.190177000  |
| C | -4.092738000 | 0.032154000  | -1.215161000 |
| C | -5.133776000 | 0.789919000  | 1.282225000  |
| C | -4.883220000 | 1.173469000  | -1.107207000 |
| C | -5.403253000 | 1.551807000  | 0.137558000  |
| H | -4.122886000 | -0.952074000 | 2.075628000  |
| H | -3.678773000 | -0.270318000 | -2.179042000 |
| H | -5.544741000 | 1.089235000  | 2.248779000  |
| H | -5.097951000 | 1.770614000  | -1.995941000 |
| H | -6.026153000 | 2.446140000  | 0.216317000  |

**[L2-Au-phenylacetylene]<sup>+</sup>:**

E = -1706.679465

G = -1706.746234

|    |              |              |              |
|----|--------------|--------------|--------------|
| C  | 2.204544000  | -2.821803000 | -1.145849000 |
| C  | 2.880848000  | -1.804982000 | -0.911309000 |
| Au | 0.445769000  | -1.552660000 | -0.739454000 |
| P  | -1.400273000 | -0.271673000 | -0.283253000 |
| H  | 2.077314000  | -3.877219000 | -1.359207000 |
| C  | 3.619288000  | -0.617519000 | -0.654168000 |
| C  | 4.248279000  | 0.065488000  | -1.720641000 |
| C  | 3.700292000  | -0.110157000 | 0.663313000  |
| C  | 4.962621000  | 1.232204000  | -1.461186000 |
| C  | 4.407935000  | 1.063675000  | 0.902909000  |
| C  | 5.041125000  | 1.730940000  | -0.153655000 |
| H  | 4.175364000  | -0.330591000 | -2.735417000 |
| H  | 3.194849000  | -0.630759000 | 1.478798000  |
| H  | 5.460819000  | 1.757126000  | -2.279115000 |
| H  | 4.467924000  | 1.461488000  | 1.917866000  |
| H  | 5.600899000  | 2.648614000  | 0.042616000  |
| O  | -1.459195000 | 0.208584000  | 1.266022000  |
| O  | -1.501626000 | 1.114076000  | -1.119362000 |
| O  | -2.788274000 | -0.979225000 | -0.602106000 |
| C  | -4.052795000 | -0.368584000 | -0.402380000 |
| C  | -4.701643000 | -0.565035000 | 0.813703000  |
| C  | -4.611027000 | 0.373731000  | -1.439678000 |
| C  | -5.966246000 | 0.004370000  | 0.991053000  |
| H  | -4.224053000 | -1.155259000 | 1.596994000  |
| C  | -5.876203000 | 0.936212000  | -1.246130000 |
| H  | -4.061152000 | 0.502327000  | -2.372758000 |
| C  | -6.552546000 | 0.752753000  | -0.035150000 |
| H  | -6.494586000 | -0.141477000 | 1.935864000  |
| H  | -6.334209000 | 1.518621000  | -2.048716000 |
| H  | -7.541815000 | 1.192685000  | 0.108489000  |

|   |              |              |              |
|---|--------------|--------------|--------------|
| C | -0.597942000 | 2.155125000  | -0.858919000 |
| C | 0.692122000  | 2.101573000  | -1.389373000 |
| C | -1.021959000 | 3.216661000  | -0.060431000 |
| C | 1.586197000  | 3.134897000  | -1.092229000 |
| H | 0.984367000  | 1.268743000  | -2.031802000 |
| C | -0.122044000 | 4.249862000  | 0.217830000  |
| H | -2.038913000 | 3.214622000  | 0.334810000  |
| C | 1.182551000  | 4.206223000  | -0.288864000 |
| H | 2.599993000  | 3.098327000  | -1.495830000 |
| H | -0.442652000 | 5.090911000  | 0.836795000  |
| H | 1.881720000  | 5.014693000  | -0.064318000 |
| C | -0.420522000 | -0.021110000 | 2.178971000  |
| C | -0.313901000 | -1.270410000 | 2.793395000  |
| C | 0.477430000  | 1.011401000  | 2.449865000  |
| C | 0.722788000  | -1.487632000 | 3.706957000  |
| H | -1.042430000 | -2.051139000 | 2.565079000  |
| C | 1.500394000  | 0.783600000  | 3.375451000  |
| H | 0.365702000  | 1.971254000  | 1.944534000  |
| C | 1.628711000  | -0.462143000 | 4.000361000  |
| H | 0.813527000  | -2.459053000 | 4.198099000  |
| H | 2.199878000  | 1.589727000  | 3.609031000  |
| H | 2.428755000  | -0.631911000 | 4.724388000  |

**[L3-Au-phenylacetylene]<sup>+</sup>:**

E = -1329.565462

G = -1329.628373

|    |              |              |              |
|----|--------------|--------------|--------------|
| C  | -1.519573000 | -0.970851000 | 1.596300000  |
| C  | -2.432003000 | -1.966927000 | 1.439747000  |
| C  | -3.114373000 | -2.003877000 | 0.101828000  |
| C  | -2.726737000 | -1.036612000 | -0.771941000 |
| C  | -0.671440000 | -0.607005000 | 2.775702000  |
| H  | -0.805476000 | 0.454366000  | 3.046148000  |
| H  | 0.401545000  | -0.751463000 | 2.561872000  |
| H  | -0.920265000 | -1.210362000 | 3.659311000  |
| C  | -2.789475000 | -2.985658000 | 2.481274000  |
| H  | -2.227642000 | -2.848058000 | 3.413376000  |
| H  | -2.591413000 | -4.005713000 | 2.112876000  |
| H  | -3.864242000 | -2.941662000 | 2.721696000  |
| C  | -4.143807000 | -3.059083000 | -0.175590000 |
| H  | -4.567666000 | -2.975742000 | -1.183885000 |
| H  | -4.972901000 | -3.000577000 | 0.548365000  |
| H  | -3.707322000 | -4.066303000 | -0.073648000 |
| C  | -3.196382000 | -0.740249000 | -2.162754000 |
| H  | -4.031141000 | -1.389759000 | -2.459417000 |
| H  | -2.387309000 | -0.876410000 | -2.900368000 |
| H  | -3.538065000 | 0.305403000  | -2.249737000 |
| C  | -2.026041000 | 1.643926000  | 0.291833000  |
| C  | -3.278150000 | 1.823899000  | 0.908210000  |
| H  | -3.868244000 | 0.955881000  | 1.214089000  |
| C  | -3.764186000 | 3.112672000  | 1.126683000  |
| H  | -4.736334000 | 3.252569000  | 1.604957000  |
| C  | -3.008086000 | 4.224453000  | 0.733139000  |
| H  | -3.392490000 | 5.232545000  | 0.905419000  |
| C  | -1.765033000 | 4.047650000  | 0.119934000  |
| H  | -1.176776000 | 4.914864000  | -0.188481000 |
| C  | -1.270615000 | 2.758619000  | -0.102350000 |
| H  | -0.298384000 | 2.624313000  | -0.583351000 |
| P  | -1.427832000 | -0.055545000 | 0.031499000  |
| C  | 2.419694000  | -0.441169000 | -2.302518000 |
| C  | 3.131975000  | -0.286987000 | -1.295930000 |
| Au | 0.642655000  | -0.206155000 | -1.019044000 |

|   |             |              |              |
|---|-------------|--------------|--------------|
| H | 2.273982000 | -0.615399000 | -3.362489000 |
| C | 3.939687000 | -0.108996000 | -0.140515000 |
| C | 4.371378000 | 1.186814000  | 0.226616000  |
| C | 4.317805000 | -1.228833000 | 0.636415000  |
| C | 5.173514000 | 1.351837000  | 1.352131000  |
| C | 5.120200000 | -1.047615000 | 1.759319000  |
| C | 5.546812000 | 0.238459000  | 2.116675000  |
| H | 4.075811000 | 2.045804000  | -0.379040000 |
| H | 3.980840000 | -2.225771000 | 0.345465000  |
| H | 5.513222000 | 2.350044000  | 1.636259000  |
| H | 5.419044000 | -1.909971000 | 2.359038000  |
| H | 6.177950000 | 0.374028000  | 2.998272000  |

**[L4-Au-phenylacetylene]<sup>2+</sup>:**

E = -1481.212033

G = -1481.284220

|    |              |              |              |
|----|--------------|--------------|--------------|
| P  | 1.014605000  | 0.521943000  | 0.017529000  |
| N  | 5.028495000  | 0.187439000  | -0.108245000 |
| N  | 3.121054000  | -2.997952000 | 0.210952000  |
| C  | 1.286127000  | 1.810422000  | -1.232797000 |
| C  | 1.366878000  | 3.000082000  | -0.574133000 |
| C  | 1.301661000  | 2.911607000  | 0.925461000  |
| C  | 1.166298000  | 1.654188000  | 1.430555000  |
| C  | 2.525474000  | -0.474692000 | 0.027011000  |
| C  | 3.913005000  | -0.486140000 | -0.018420000 |
| C  | 3.178013000  | -1.695833000 | 0.101075000  |
| C  | 4.998495000  | 1.651928000  | -0.221927000 |
| H  | 3.960304000  | 2.004602000  | -0.216370000 |
| H  | 5.545783000  | 2.098955000  | 0.622166000  |
| H  | 5.482934000  | 1.959262000  | -1.161563000 |
| C  | 6.352940000  | -0.441425000 | -0.106458000 |
| H  | 6.949337000  | -0.047150000 | 0.730453000  |
| H  | 6.260371000  | -1.527259000 | 0.001981000  |
| H  | 6.873658000  | -0.216726000 | -1.050010000 |
| C  | 4.311688000  | -3.853076000 | 0.236323000  |
| H  | 5.218568000  | -3.246390000 | 0.142709000  |
| H  | 4.349206000  | -4.412222000 | 1.183888000  |
| H  | 4.272755000  | -4.569918000 | -0.598189000 |
| C  | 1.825621000  | -3.678891000 | 0.312113000  |
| H  | 1.785267000  | -4.262184000 | 1.244933000  |
| H  | 1.012345000  | -2.942059000 | 0.310932000  |
| H  | 1.696651000  | -4.363326000 | -0.540790000 |
| C  | 1.301154000  | 1.507079000  | -2.699900000 |
| H  | 0.314885000  | 1.155058000  | -3.047093000 |
| H  | 1.566081000  | 2.392006000  | -3.293923000 |
| H  | 2.027738000  | 0.713305000  | -2.943240000 |
| C  | 1.504910000  | 4.340295000  | -1.230864000 |
| H  | 0.647599000  | 4.984864000  | -0.976157000 |
| H  | 2.405312000  | 4.864711000  | -0.871829000 |
| H  | 1.561754000  | 4.271480000  | -2.323822000 |
| C  | 1.377781000  | 4.164399000  | 1.744776000  |
| H  | 0.555798000  | 4.849680000  | 1.480791000  |
| H  | 1.320693000  | 3.968193000  | 2.822105000  |
| H  | 2.314882000  | 4.709256000  | 1.544955000  |
| C  | 1.058709000  | 1.180092000  | 2.847543000  |
| H  | 1.267844000  | 1.988049000  | 3.561356000  |
| H  | 0.048814000  | 0.793851000  | 3.067246000  |
| H  | 1.768680000  | 0.361889000  | 3.056505000  |
| C  | -2.665536000 | -1.958702000 | -0.366385000 |
| C  | -3.742035000 | -1.311261000 | -0.225053000 |
| Au | -0.934761000 | -0.752022000 | -0.161384000 |

|   |              |              |              |
|---|--------------|--------------|--------------|
| H | -2.509011000 | -3.019426000 | -0.586087000 |
| C | -4.894981000 | -0.548706000 | -0.064268000 |
| C | -5.495604000 | -0.424090000 | 1.222804000  |
| C | -5.501402000 | 0.072239000  | -1.195488000 |
| C | -6.669064000 | 0.302051000  | 1.363991000  |
| C | -6.674450000 | 0.794710000  | -1.033858000 |
| C | -7.255480000 | 0.908036000  | 0.240259000  |
| H | -5.029168000 | -0.909232000 | 2.082560000  |
| H | -5.038760000 | -0.034388000 | -2.178694000 |
| H | -7.139805000 | 0.398537000  | 2.344438000  |
| H | -7.149190000 | 1.269695000  | -1.894790000 |
| H | -8.182369000 | 1.475237000  | 0.358857000  |

**[L5-Au-phenylacetylene]<sup>2+</sup>:**

E = -1776.253432

G = -1776.326051

|   |              |              |              |
|---|--------------|--------------|--------------|
| P | -0.725247000 | 1.095258000  | 0.018487000  |
| N | -2.740228000 | -0.846978000 | 0.023646000  |
| C | -0.605570000 | 2.410895000  | -1.216939000 |
| C | -0.420159000 | 3.580367000  | -0.539148000 |
| C | -0.485325000 | 3.476758000  | 0.951717000  |
| C | -0.714496000 | 2.224113000  | 1.440982000  |
| C | -2.477144000 | 0.422773000  | -0.062140000 |
| C | -3.742212000 | 1.261307000  | -0.247564000 |
| C | -4.836709000 | 0.245402000  | 0.168057000  |
| H | -5.091581000 | 0.405576000  | 1.226118000  |
| H | -5.757326000 | 0.381709000  | -0.414348000 |
| C | -4.257153000 | -1.166164000 | -0.009214000 |
| C | -4.638876000 | -2.102709000 | 1.136724000  |
| H | -5.724833000 | -2.270339000 | 1.082529000  |
| H | -4.421141000 | -1.665633000 | 2.118636000  |
| H | -4.145187000 | -3.081024000 | 1.053464000  |
| C | -4.613059000 | -1.821738000 | -1.348893000 |
| H | -4.109270000 | -2.790870000 | -1.465482000 |
| H | -4.378038000 | -1.186900000 | -2.210871000 |
| H | -5.696754000 | -2.007380000 | -1.355399000 |
| C | -3.817446000 | 2.529013000  | 0.617696000  |
| H | -3.109326000 | 3.295219000  | 0.282521000  |
| H | -3.633414000 | 2.314587000  | 1.679835000  |
| H | -4.832169000 | 2.945554000  | 0.529390000  |
| C | -3.862577000 | 1.662526000  | -1.742122000 |
| H | -4.860326000 | 2.098213000  | -1.900087000 |
| H | -3.758021000 | 0.808946000  | -2.425565000 |
| H | -3.117943000 | 2.420507000  | -2.012810000 |
| C | -1.790028000 | -1.947034000 | 0.070032000  |
| C | -1.404093000 | -2.461195000 | 1.327909000  |
| C | -0.603594000 | -3.612496000 | 1.335520000  |
| H | -0.298272000 | -4.034645000 | 2.296121000  |
| C | -0.198655000 | -4.219501000 | 0.147271000  |
| H | 0.401693000  | -5.131960000 | 0.177634000  |
| C | -0.538160000 | -3.649271000 | -1.079108000 |
| H | -0.180089000 | -4.099168000 | -2.008403000 |
| C | -1.330490000 | -2.494307000 | -1.150979000 |
| C | -1.593920000 | -1.882644000 | -2.506021000 |
| H | -2.264996000 | -2.513634000 | -3.108492000 |
| H | -2.040310000 | -0.882792000 | -2.455128000 |
| H | -0.649255000 | -1.795251000 | -3.063665000 |
| C | -1.764533000 | -1.819217000 | 2.644731000  |
| H | -2.255550000 | -0.845316000 | 2.534860000  |
| H | -2.431497000 | -2.468479000 | 3.232452000  |
| H | -0.855835000 | -1.668842000 | 3.247309000  |

|    |              |              |              |
|----|--------------|--------------|--------------|
| C  | -0.495994000 | 2.149999000  | -2.693015000 |
| H  | 0.558628000  | 2.043352000  | -2.999364000 |
| H  | -1.013777000 | 1.227061000  | -2.990859000 |
| H  | -0.926584000 | 2.974433000  | -3.280133000 |
| C  | -0.129200000 | 4.898296000  | -1.188694000 |
| H  | -0.137195000 | 4.838849000  | -2.283811000 |
| H  | -0.863719000 | 5.659267000  | -0.878708000 |
| H  | 0.859627000  | 5.273789000  | -0.876931000 |
| C  | -0.305747000 | 4.706401000  | 1.787863000  |
| H  | -1.098729000 | 5.439492000  | 1.563069000  |
| H  | -0.337551000 | 4.497496000  | 2.863709000  |
| H  | 0.651766000  | 5.201786000  | 1.560641000  |
| C  | -0.831348000 | 1.756161000  | 2.859740000  |
| H  | -0.491725000 | 2.527790000  | 3.563508000  |
| H  | -1.873754000 | 1.511220000  | 3.127819000  |
| H  | -0.227907000 | 0.852904000  | 3.038615000  |
| C  | 2.624963000  | -1.830399000 | -0.009653000 |
| C  | 3.760484000  | -1.279631000 | -0.029473000 |
| Au | 1.034225000  | -0.440527000 | -0.013598000 |
| H  | 2.314131000  | -2.878853000 | 0.013479000  |
| C  | 4.990794000  | -0.625146000 | -0.049492000 |
| C  | 5.623871000  | -0.333235000 | -1.292054000 |
| C  | 5.639170000  | -0.290099000 | 1.174171000  |
| C  | 6.870937000  | 0.275303000  | -1.300344000 |
| C  | 6.886141000  | 0.317985000  | 1.145882000  |
| C  | 7.499281000  | 0.598295000  | -0.086340000 |
| H  | 5.123932000  | -0.599907000 | -2.225342000 |
| H  | 5.150640000  | -0.523629000 | 2.122249000  |
| H  | 7.366373000  | 0.497531000  | -2.247646000 |
| H  | 7.393116000  | 0.573072000  | 2.078684000  |
| H  | 8.483804000  | 1.072990000  | -0.100766000 |

**[L6-Au-phenylacetylene]<sup>2+</sup>:**

E = -1481.293388

G = -1481.361150

|   |              |              |              |
|---|--------------|--------------|--------------|
| C | -2.541763000 | -2.068895000 | -0.255699000 |
| C | -3.643398000 | -1.450941000 | -0.167113000 |
| H | -2.382041000 | -3.141081000 | -0.417337000 |
| C | -4.828596000 | -0.733054000 | -0.066352000 |
| C | -5.462147000 | -0.574300000 | 1.202285000  |
| C | -5.438428000 | -0.195109000 | -1.238876000 |
| C | -6.669774000 | 0.102414000  | 1.284787000  |
| C | -6.645630000 | 0.479291000  | -1.135210000 |
| C | -7.258263000 | 0.626084000  | 0.121027000  |
| H | -4.992904000 | -0.996141000 | 2.093344000  |
| H | -4.950656000 | -0.328204000 | -2.206604000 |
| H | -7.166261000 | 0.223620000  | 2.249672000  |
| H | -7.123513000 | 0.889783000  | -2.027005000 |
| H | -8.212540000 | 1.154378000  | 0.193829000  |
| P | 1.099938000  | 0.480336000  | 0.051110000  |
| N | 2.999034000  | -1.684196000 | 0.150864000  |
| C | 1.060539000  | 1.680964000  | 1.412927000  |
| C | 0.884876000  | 2.910267000  | 0.849130000  |
| C | 0.922306000  | 2.941660000  | -0.652253000 |
| C | 1.128019000  | 1.737780000  | -1.256251000 |
| C | 2.742157000  | -0.353417000 | 0.065136000  |
| N | 3.942846000  | 0.269153000  | -0.050330000 |
| C | 4.962091000  | -0.666152000 | -0.057110000 |
| C | 4.364745000  | -1.905398000 | 0.072625000  |
| C | 4.988198000  | -3.259057000 | 0.131447000  |
| H | 6.075019000  | -3.177955000 | 0.008138000  |



|    |              |              |              |
|----|--------------|--------------|--------------|
| H  | 4.612633000  | -3.916976000 | -0.668095000 |
| H  | 4.804109000  | -3.751508000 | 1.100151000  |
| C  | 1.070075000  | 1.263320000  | 2.852128000  |
| H  | 0.160542000  | 0.695635000  | 3.113117000  |
| H  | 1.933040000  | 0.615939000  | 3.081925000  |
| H  | 1.123139000  | 2.131238000  | 3.523048000  |
| C  | 0.658671000  | 4.180585000  | 1.611418000  |
| H  | 0.671397000  | 4.029961000  | 2.697489000  |
| H  | 1.423758000  | 4.932787000  | 1.359863000  |
| H  | -0.314297000 | 4.623093000  | 1.341670000  |
| C  | 0.742279000  | 4.245108000  | -1.369039000 |
| H  | 1.517441000  | 4.968475000  | -1.066962000 |
| H  | 0.782569000  | 4.137578000  | -2.459584000 |
| H  | -0.226907000 | 4.700354000  | -1.108131000 |
| C  | 1.227728000  | 1.381007000  | -2.708251000 |
| H  | 1.243601000  | 2.276353000  | -3.343928000 |
| H  | 2.145030000  | 0.805912000  | -2.923501000 |
| H  | 0.376901000  | 0.757677000  | -3.031379000 |
| Au | -0.808998000 | -0.878029000 | -0.086466000 |
| C  | 6.403644000  | -0.306674000 | -0.182257000 |
| H  | 6.753352000  | 0.278767000  | 0.683868000  |
| H  | 7.017722000  | -1.213877000 | -0.234819000 |
| H  | 6.596789000  | 0.280306000  | -1.093868000 |
| C  | 2.011498000  | -2.756958000 | 0.308274000  |
| H  | 1.427561000  | -2.878373000 | -0.614548000 |
| H  | 2.535809000  | -3.693650000 | 0.519765000  |
| H  | 1.343001000  | -2.536758000 | 1.149716000  |
| C  | 4.155291000  | 1.715305000  | -0.158893000 |
| H  | 3.493750000  | 2.237792000  | 0.541038000  |
| H  | 5.194136000  | 1.942799000  | 0.100087000  |
| H  | 3.951714000  | 2.053640000  | -1.183835000 |

**[L7-Au-phenylacetylene]<sup>2+</sup>:**

E = -1632.501936

G = -1632.574303

|    |              |              |              |
|----|--------------|--------------|--------------|
| C  | -2.668126000 | -0.640030000 | -2.057513000 |
| C  | -3.771729000 | -0.411758000 | -1.487990000 |
| Au | -1.006389000 | -0.248725000 | -0.796758000 |
| P  | 0.916016000  | 0.131760000  | 0.494665000  |
| H  | -2.440450000 | -0.990703000 | -3.068711000 |
| C  | 1.121905000  | -1.036744000 | 1.875532000  |
| C  | -0.033260000 | -1.518082000 | 2.517136000  |
| C  | 2.393474000  | -1.425738000 | 2.336975000  |
| C  | 0.085680000  | -2.376593000 | 3.612280000  |
| C  | 2.502737000  | -2.288751000 | 3.429234000  |
| C  | 1.350695000  | -2.763020000 | 4.067242000  |
| H  | -1.025609000 | -1.224726000 | 2.164288000  |
| H  | 3.301114000  | -1.057244000 | 1.852476000  |
| H  | -0.812688000 | -2.748067000 | 4.110001000  |
| H  | 3.490048000  | -2.589150000 | 3.787395000  |
| H  | 1.440246000  | -3.437339000 | 4.922024000  |
| C  | 1.112377000  | 1.840333000  | 1.094751000  |
| C  | 1.936503000  | 2.124110000  | 2.198249000  |
| C  | 0.463558000  | 2.882950000  | 0.409537000  |
| C  | 2.121139000  | 3.449333000  | 2.598358000  |
| C  | 0.658803000  | 4.205835000  | 0.815103000  |
| C  | 1.487967000  | 4.488766000  | 1.906142000  |
| H  | 2.422466000  | 1.319271000  | 2.754123000  |
| H  | -0.193074000 | 2.667074000  | -0.437789000 |
| H  | 2.755363000  | 3.671226000  | 3.459597000  |
| H  | 0.154139000  | 5.016494000  | 0.284759000  |

|   |              |              |              |
|---|--------------|--------------|--------------|
| H | 1.631930000  | 5.523162000  | 2.226925000  |
| C | -4.958908000 | -0.141618000 | -0.810615000 |
| C | -5.620794000 | -1.177639000 | -0.090115000 |
| C | -5.536198000 | 1.159600000  | -0.875558000 |
| C | -6.825971000 | -0.910467000 | 0.543453000  |
| C | -6.741660000 | 1.407846000  | -0.234881000 |
| C | -7.383566000 | 0.376750000  | 0.470603000  |
| H | -5.175963000 | -2.174053000 | -0.052606000 |
| H | -5.026783000 | 1.945683000  | -1.436493000 |
| H | -7.343560000 | -1.699431000 | 1.092855000  |
| H | -7.194195000 | 2.400352000  | -0.283123000 |
| H | -8.335307000 | 0.578713000  | 0.968837000  |
| C | 2.397021000  | -0.148229000 | -0.509535000 |
| C | 3.495549000  | 0.320926000  | -1.214424000 |
| C | 3.207367000  | -1.066695000 | -1.156533000 |
| N | 3.459876000  | -2.320140000 | -1.434340000 |
| N | 4.234518000  | 1.325827000  | -1.608864000 |
| C | 2.574280000  | -3.380660000 | -0.936026000 |
| H | 1.772664000  | -2.947407000 | -0.325457000 |
| H | 2.137361000  | -3.929799000 | -1.784374000 |
| H | 3.151840000  | -4.084261000 | -0.317173000 |
| C | 4.605854000  | -2.749550000 | -2.240445000 |
| H | 4.253309000  | -3.288918000 | -3.133097000 |
| H | 5.196050000  | -1.882888000 | -2.557094000 |
| H | 5.245821000  | -3.422966000 | -1.649762000 |
| C | 5.423349000  | 1.156454000  | -2.449273000 |
| H | 5.567881000  | 0.099862000  | -2.698860000 |
| H | 5.304580000  | 1.730555000  | -3.381001000 |
| H | 6.313334000  | 1.526114000  | -1.916900000 |
| C | 3.906087000  | 2.701696000  | -1.213134000 |
| H | 4.751947000  | 3.136075000  | -0.658511000 |
| H | 3.721428000  | 3.310788000  | -2.111421000 |
| H | 3.015044000  | 2.710502000  | -0.575911000 |

**[L8-Au-phenylacetylene]<sup>+</sup>:**

E = -749.186825

G = -748.260468

|    |              |              |              |
|----|--------------|--------------|--------------|
| C  | -1.201034000 | -1.295790000 | -1.807012000 |
| C  | -2.000795000 | -0.747571000 | -1.029267000 |
| H  | -0.945436000 | -1.909452000 | -2.663033000 |
| C  | -2.952098000 | -0.134507000 | -0.164361000 |
| C  | -3.401334000 | -0.817186000 | 0.988948000  |
| C  | -3.461307000 | 1.147832000  | -0.471555000 |
| C  | -4.350267000 | -0.221905000 | 1.815728000  |
| C  | -4.410498000 | 1.730089000  | 0.364295000  |
| C  | -4.853748000 | 1.048063000  | 1.504942000  |
| H  | -3.005807000 | -1.808743000 | 1.217993000  |
| H  | -3.112230000 | 1.667565000  | -1.366018000 |
| H  | -4.703795000 | -0.748529000 | 2.704705000  |
| H  | -4.810874000 | 2.717983000  | 0.126828000  |
| H  | -5.600030000 | 1.509394000  | 2.156176000  |
| N  | 2.831304000  | -0.420997000 | 1.250022000  |
| C  | 2.101493000  | 0.231962000  | 0.309342000  |
| N  | 2.779538000  | 1.380860000  | 0.056924000  |
| C  | 3.922436000  | 1.446470000  | 0.830533000  |
| C  | 3.955496000  | 0.310393000  | 1.581768000  |
| H  | 4.676511000  | -0.031994000 | 2.319589000  |
| Au | 0.377094000  | -0.412923000 | -0.583161000 |
| H  | 4.607763000  | 2.289001000  | 0.786773000  |
| C  | 2.524740000  | -1.728220000 | 1.825135000  |
| H  | 3.209280000  | -2.489370000 | 1.422947000  |

|   |             |              |              |
|---|-------------|--------------|--------------|
| H | 2.629886000 | -1.682692000 | 2.917815000  |
| H | 1.493202000 | -2.002402000 | 1.575107000  |
| C | 2.395143000 | 2.420654000  | -0.894055000 |
| H | 1.415353000 | 2.177049000  | -1.320841000 |
| H | 2.333921000 | 3.390168000  | -0.379852000 |
| H | 3.136558000 | 2.482229000  | -1.703761000 |

**[L9-Au-phenylacetylene]<sup>+</sup>:**

E = -902.896540

G = -901.768012

|    |              |              |              |
|----|--------------|--------------|--------------|
| C  | -2.359202000 | -2.103085000 | 0.210327000  |
| C  | -2.951215000 | -1.015819000 | 0.100962000  |
| H  | -2.320191000 | -3.180618000 | 0.319960000  |
| C  | -3.661846000 | 0.212067000  | -0.022587000 |
| C  | -4.013752000 | 0.943809000  | 1.134528000  |
| C  | -4.029910000 | 0.689026000  | -1.301309000 |
| C  | -4.728285000 | 2.131878000  | 1.007210000  |
| C  | -4.744660000 | 1.878592000  | -1.412825000 |
| C  | -5.092896000 | 2.598571000  | -0.262500000 |
| H  | -3.728050000 | 0.567475000  | 2.118810000  |
| H  | -3.756248000 | 0.117259000  | -2.190269000 |
| H  | -5.006751000 | 2.696996000  | 1.899241000  |
| H  | -5.035778000 | 2.247477000  | -2.398616000 |
| H  | -5.655370000 | 3.530601000  | -0.356299000 |
| N  | 2.149247000  | 0.195443000  | 1.079003000  |
| C  | 1.402688000  | -0.211996000 | 0.021087000  |
| N  | 2.167892000  | -0.065060000 | -1.090339000 |
| C  | 3.417539000  | 0.445204000  | -0.747563000 |
| C  | 3.405813000  | 0.611874000  | 0.646602000  |
| Au | -0.504983000 | -0.949705000 | 0.093897000  |
| C  | 1.744822000  | 0.212638000  | 2.477495000  |
| H  | 2.405770000  | -0.440153000 | 3.066838000  |
| H  | 1.805929000  | 1.237906000  | 2.871579000  |
| H  | 0.712860000  | -0.146601000 | 2.564509000  |
| C  | 1.786156000  | -0.377116000 | -2.460259000 |
| H  | 0.766791000  | -0.779972000 | -2.473300000 |
| H  | 1.824967000  | 0.533235000  | -3.076846000 |
| H  | 2.475281000  | -1.125674000 | -2.878505000 |
| C  | 4.538840000  | 0.770774000  | -1.517462000 |
| H  | 4.550174000  | 0.642578000  | -2.600679000 |
| C  | 4.515273000  | 1.110894000  | 1.336682000  |
| H  | 4.509319000  | 1.239869000  | 2.419863000  |
| C  | 5.645768000  | 1.268700000  | -0.831059000 |
| H  | 6.544474000  | 1.536177000  | -1.390643000 |
| C  | 5.634222000  | 1.435524000  | 0.570589000  |
| H  | 6.524359000  | 1.828249000  | 1.066329000  |

**[L10-Au-phenylacetylene]<sup>+</sup>:**

E = -557.552896

G = -557.593409

|   |              |              |              |
|---|--------------|--------------|--------------|
| C | 0.119801000  | -1.542005000 | -0.000957000 |
| C | 1.269574000  | -1.008163000 | -0.000738000 |
| H | -0.135786000 | -2.609050000 | -0.001624000 |
| C | 2.501411000  | -0.368074000 | -0.000251000 |
| C | 3.140659000  | -0.051719000 | -1.236082000 |
| C | 3.140973000  | -0.053997000 | 1.235991000  |
| C | 4.384689000  | 0.560604000  | -1.224634000 |
| C | 4.385022000  | 0.558305000  | 1.225347000  |
| C | 5.002791000  | 0.863027000  | 0.000558000  |
| H | 2.643751000  | -0.299292000 | -2.176246000 |

|    |              |              |              |
|----|--------------|--------------|--------------|
| H  | 2.644305000  | -0.303284000 | 2.175830000  |
| H  | 4.884247000  | 0.805538000  | -2.164022000 |
| H  | 4.884840000  | 0.801471000  | 2.165056000  |
| H  | 5.984302000  | 1.344286000  | 0.000878000  |
| C  | -3.011853000 | 1.064853000  | 0.000867000  |
| Au | -1.459295000 | -0.175996000 | -0.000138000 |
| O  | -3.902473000 | 1.753374000  | 0.001302000  |

**TS1 :**

E = -1831.195685

G = -1831.271532

|    |              |              |              |
|----|--------------|--------------|--------------|
| C  | -2.152411000 | -0.730418000 | 0.025504000  |
| C  | -2.820780000 | 0.383915000  | 0.107499000  |
| Au | -0.064125000 | -0.582856000 | 0.025648000  |
| P  | 2.261358000  | -0.251867000 | 0.008357000  |
| H  | -2.634060000 | -1.713818000 | -0.029731000 |
| C  | 3.020442000  | -0.406509000 | 1.664866000  |
| C  | 4.027941000  | 0.465803000  | 2.105981000  |
| C  | 2.595959000  | -1.458969000 | 2.494490000  |
| C  | 4.608618000  | 0.279239000  | 3.364185000  |
| C  | 3.183889000  | -1.643238000 | 3.746925000  |
| C  | 4.190523000  | -0.774033000 | 4.182990000  |
| H  | 4.359447000  | 1.291247000  | 1.472386000  |
| H  | 1.803689000  | -2.134556000 | 2.159530000  |
| H  | 5.391259000  | 0.961226000  | 3.704873000  |
| H  | 2.852416000  | -2.464067000 | 4.387268000  |
| H  | 4.646578000  | -0.916077000 | 5.165704000  |
| C  | 2.662873000  | 1.435864000  | -0.580649000 |
| C  | 1.816563000  | 2.496070000  | -0.211011000 |
| C  | 3.801357000  | 1.695754000  | -1.360486000 |
| C  | 2.115521000  | 3.801251000  | -0.605484000 |
| C  | 4.092725000  | 3.004787000  | -1.756030000 |
| C  | 3.254074000  | 4.057765000  | -1.377571000 |
| H  | 0.916587000  | 2.303752000  | 0.379388000  |
| H  | 4.459851000  | 0.878951000  | -1.664162000 |
| H  | 1.451638000  | 4.618024000  | -0.312938000 |
| H  | 4.978999000  | 3.201037000  | -2.364049000 |
| H  | 3.485497000  | 5.079202000  | -1.689135000 |
| C  | 3.179030000  | -1.400059000 | -1.078653000 |
| C  | 2.610171000  | -1.746809000 | -2.316375000 |
| C  | 4.438362000  | -1.908788000 | -0.723049000 |
| C  | 3.301126000  | -2.584405000 | -3.193496000 |
| C  | 5.122610000  | -2.752043000 | -1.603686000 |
| C  | 4.557583000  | -3.088119000 | -2.837522000 |
| H  | 1.624270000  | -1.361771000 | -2.592132000 |
| H  | 4.884753000  | -1.651800000 | 0.239907000  |
| H  | 2.856010000  | -2.850541000 | -4.155100000 |
| H  | 6.101104000  | -3.148417000 | -1.322470000 |
| H  | 5.094861000  | -3.748494000 | -3.522433000 |
| C  | -2.571562000 | 1.820695000  | 0.047659000  |
| C  | -2.894960000 | 2.681958000  | 1.114891000  |
| C  | -1.919539000 | 2.349302000  | -1.086247000 |
| C  | -2.562822000 | 4.034250000  | 1.053833000  |
| C  | -1.586336000 | 3.703684000  | -1.140646000 |
| C  | -1.908978000 | 4.548375000  | -0.073879000 |
| H  | -3.394981000 | 2.281564000  | 1.999106000  |
| H  | -1.658232000 | 1.680231000  | -1.908306000 |
| H  | -2.809122000 | 4.691735000  | 1.890658000  |
| H  | -1.069997000 | 4.098524000  | -2.018371000 |
| H  | -1.653180000 | 5.609730000  | -0.119048000 |
| C  | -4.853841000 | 0.196019000  | 0.242549000  |

|   |              |              |              |
|---|--------------|--------------|--------------|
| C | -4.997936000 | -0.735116000 | 1.330151000  |
| C | -5.047389000 | -0.233565000 | -1.113596000 |
| C | -5.144609000 | -1.599876000 | -1.366271000 |
| C | -5.164267000 | -2.532048000 | -0.315344000 |
| C | -5.114036000 | -2.078245000 | 1.027927000  |
| H | -5.046981000 | 1.247744000  | 0.459394000  |
| H | -5.231891000 | -1.953126000 | -2.396422000 |
| H | -5.178065000 | -2.813224000 | 1.834771000  |
| C | -5.282127000 | -4.003432000 | -0.589035000 |
| H | -6.206268000 | -4.401644000 | -0.136871000 |
| H | -5.296481000 | -4.228953000 | -1.663885000 |
| H | -4.445630000 | -4.553072000 | -0.126650000 |
| C | -5.137527000 | 0.785235000  | -2.208788000 |
| H | -6.112054000 | 1.301043000  | -2.159142000 |
| H | -4.364904000 | 1.562352000  | -2.097629000 |
| H | -5.044783000 | 0.329298000  | -3.204096000 |
| C | -4.916057000 | -0.240236000 | 2.744260000  |
| H | -5.268185000 | -0.994259000 | 3.461789000  |
| H | -3.867433000 | -0.002505000 | 2.995688000  |
| H | -5.504321000 | 0.679928000  | 2.885208000  |

**TS2:**

E = -2057.018161

G = -2057.098105

|    |              |              |              |
|----|--------------|--------------|--------------|
| C  | 2.259302000  | 0.569547000  | 0.048985000  |
| C  | 2.780238000  | -0.498926000 | 0.577466000  |
| Au | 0.181318000  | 0.630226000  | -0.133795000 |
| P  | -2.096125000 | 0.521373000  | -0.443830000 |
| H  | 2.862528000  | 1.404620000  | -0.326674000 |
| C  | 2.396104000  | -1.826242000 | 1.033236000  |
| C  | 2.658961000  | -2.273753000 | 2.344052000  |
| C  | 1.679458000  | -2.664580000 | 0.151713000  |
| C  | 2.212210000  | -3.524671000 | 2.763302000  |
| C  | 1.227788000  | -3.912915000 | 0.581750000  |
| C  | 1.496497000  | -4.347447000 | 1.883146000  |
| H  | 3.205332000  | -1.629667000 | 3.035703000  |
| H  | 1.456906000  | -2.320392000 | -0.860107000 |
| H  | 2.415487000  | -3.859651000 | 3.782926000  |
| H  | 0.660810000  | -4.541031000 | -0.107629000 |
| H  | 1.147950000  | -5.328070000 | 2.215737000  |
| C  | 4.853784000  | -0.460712000 | 0.747746000  |
| C  | 5.064060000  | 0.781934000  | 1.437908000  |
| C  | 5.106634000  | -0.566689000 | -0.660216000 |
| C  | 5.353009000  | 0.601813000  | -1.376807000 |
| C  | 5.451269000  | 1.844509000  | -0.727264000 |
| C  | 5.323258000  | 1.911424000  | 0.683281000  |
| H  | 4.923759000  | -1.377933000 | 1.333510000  |
| H  | 5.495748000  | 0.551319000  | -2.458815000 |
| H  | 5.444904000  | 2.878630000  | 1.178264000  |
| C  | 5.733940000  | 3.100550000  | -1.499878000 |
| H  | 6.702442000  | 3.527279000  | -1.187974000 |
| H  | 5.766101000  | 2.926232000  | -2.583850000 |
| H  | 4.971337000  | 3.868226000  | -1.289512000 |
| C  | 5.095281000  | -1.914813000 | -1.315223000 |
| H  | 5.986447000  | -2.489186000 | -1.009223000 |
| H  | 4.218887000  | -2.503537000 | -0.999640000 |
| H  | 5.098173000  | -1.839712000 | -2.411314000 |
| C  | 4.906834000  | 0.840082000  | 2.929309000  |
| H  | 5.335605000  | 1.760653000  | 3.348958000  |
| H  | 3.835039000  | 0.820140000  | 3.193823000  |
| H  | 5.382584000  | -0.023294000 | 3.419893000  |

|   |              |              |              |
|---|--------------|--------------|--------------|
| O | -2.905400000 | 1.854234000  | -0.883128000 |
| O | -2.814502000 | -0.052851000 | 0.889975000  |
| O | -2.606528000 | -0.422413000 | -1.662308000 |
| C | -4.104100000 | -0.589441000 | 1.013406000  |
| C | -5.206939000 | -0.032397000 | 0.363391000  |
| C | -4.225569000 | -1.710237000 | 1.835680000  |
| C | -6.459897000 | -0.626421000 | 0.546780000  |
| C | -5.485334000 | -2.288371000 | 2.011806000  |
| C | -6.603917000 | -1.749779000 | 1.366475000  |
| H | -5.091449000 | 0.844363000  | -0.273771000 |
| H | -3.335098000 | -2.110123000 | 2.323956000  |
| H | -7.330277000 | -0.200832000 | 0.042099000  |
| H | -5.591457000 | -3.163751000 | 2.656831000  |
| H | -7.587383000 | -2.204155000 | 1.504330000  |
| C | -2.614937000 | 3.109089000  | -0.332967000 |
| C | -2.611581000 | 3.303973000  | 1.050363000  |
| C | -2.358092000 | 4.152769000  | -1.221746000 |
| C | -2.335764000 | 4.582095000  | 1.547895000  |
| C | -2.093095000 | 5.425338000  | -0.709306000 |
| C | -2.077797000 | 5.641672000  | 0.673412000  |
| H | -2.835577000 | 2.475035000  | 1.724116000  |
| H | -2.377619000 | 3.956623000  | -2.295148000 |
| H | -2.332971000 | 4.747426000  | 2.627772000  |
| H | -1.897818000 | 6.252080000  | -1.396261000 |
| H | -1.870835000 | 6.638635000  | 1.068525000  |
| C | -1.979753000 | -1.641786000 | -1.935527000 |
| C | -2.479620000 | -2.811306000 | -1.361330000 |
| C | -0.885748000 | -1.660986000 | -2.803406000 |
| C | -1.867667000 | -4.029193000 | -1.673164000 |
| C | -0.281271000 | -2.885262000 | -3.104260000 |
| C | -0.771448000 | -4.069608000 | -2.542089000 |
| H | -3.340009000 | -2.758349000 | -0.692134000 |
| H | -0.532188000 | -0.725739000 | -3.241271000 |
| H | -2.257473000 | -4.952432000 | -1.238045000 |
| H | 0.567538000  | -2.913383000 | -3.791647000 |
| H | -0.304840000 | -5.025791000 | -2.789984000 |

**TS3:**

E = -1679.904893

G = -1679.979956

|   |              |              |              |
|---|--------------|--------------|--------------|
| C | -1.944514000 | -0.580139000 | -0.311039000 |
| C | -2.608518000 | 0.459221000  | 0.106132000  |
| H | -2.433658000 | -1.490593000 | -0.677076000 |
| C | -2.353307000 | 1.727775000  | 0.779418000  |
| C | -1.676475000 | 1.712688000  | 2.017407000  |
| C | -2.699365000 | 2.966026000  | 0.203725000  |
| C | -1.341159000 | 2.909912000  | 2.652194000  |
| C | -2.365415000 | 4.158187000  | 0.843848000  |
| C | -1.686490000 | 4.133502000  | 2.069063000  |
| H | -1.402878000 | 0.752909000  | 2.460200000  |
| H | -3.218971000 | 2.988765000  | -0.756329000 |
| H | -0.812010000 | 2.886890000  | 3.607746000  |
| H | -2.629914000 | 5.113241000  | 0.384334000  |
| H | -1.428544000 | 5.070075000  | 2.568960000  |
| C | -4.643435000 | 0.340409000  | -0.065042000 |
| C | -4.820999000 | -0.636858000 | 0.971813000  |
| C | -4.806761000 | -0.024860000 | -1.447368000 |
| C | -4.922619000 | -1.366054000 | -1.758253000 |
| C | -4.956033000 | -2.359141000 | -0.745646000 |
| C | -4.919679000 | -1.977159000 | 0.606173000  |

|    |              |              |              |
|----|--------------|--------------|--------------|
| H  | -4.837131000 | 1.380801000  | 0.200004000  |
| H  | -4.999885000 | -1.676828000 | -2.803572000 |
| H  | -4.995189000 | -2.743706000 | 1.380955000  |
| C  | -5.076760000 | -3.803172000 | -1.138092000 |
| H  | -6.022972000 | -3.970813000 | -1.680329000 |
| H  | -4.265953000 | -4.088280000 | -1.828418000 |
| H  | -5.051097000 | -4.476204000 | -0.270486000 |
| C  | -4.744344000 | 1.036806000  | -2.505710000 |
| H  | -5.330615000 | 1.924864000  | -2.222299000 |
| H  | -3.698692000 | 1.363336000  | -2.644417000 |
| H  | -5.110491000 | 0.669949000  | -3.474581000 |
| C  | -4.893817000 | -0.195097000 | 2.401863000  |
| H  | -4.802860000 | -1.039086000 | 3.099323000  |
| H  | -4.111980000 | 0.545812000  | 2.632574000  |
| H  | -5.861698000 | 0.300756000  | 2.590227000  |
| Au | 0.145398000  | -0.461573000 | -0.295062000 |
| C  | 2.980009000  | 1.505750000  | 0.088992000  |
| C  | 3.685047000  | 1.946759000  | -0.986703000 |
| C  | 3.900052000  | 0.926626000  | -2.064992000 |
| C  | 3.353962000  | -0.294385000 | -1.820009000 |
| C  | 2.570928000  | 2.223414000  | 1.338414000  |
| H  | 2.886282000  | 1.664209000  | 2.236153000  |
| H  | 1.473902000  | 2.332538000  | 1.397050000  |
| H  | 3.012140000  | 3.228042000  | 1.398467000  |
| C  | 4.236150000  | 3.332548000  | -1.157366000 |
| H  | 4.028547000  | 3.975389000  | -0.292663000 |
| H  | 3.807700000  | 3.816838000  | -2.050627000 |
| H  | 5.327826000  | 3.307115000  | -1.307785000 |
| C  | 4.674465000  | 1.299789000  | -3.295809000 |
| H  | 4.751886000  | 0.469172000  | -4.008356000 |
| H  | 5.696773000  | 1.621460000  | -3.036962000 |
| H  | 4.200137000  | 2.148600000  | -3.815495000 |
| C  | 3.383158000  | -1.547967000 | -2.638591000 |
| H  | 4.005368000  | -1.438088000 | -3.537491000 |
| H  | 2.369730000  | -1.839323000 | -2.963211000 |
| H  | 3.786599000  | -2.391891000 | -2.052758000 |
| C  | 3.351589000  | -1.293546000 | 0.949663000  |
| C  | 4.742000000  | -1.150015000 | 1.106580000  |
| H  | 5.281092000  | -0.397337000 | 0.525035000  |
| C  | 5.429410000  | -1.968056000 | 2.003066000  |
| H  | 6.509395000  | -1.855098000 | 2.123824000  |
| C  | 4.736626000  | -2.932619000 | 2.746258000  |
| H  | 5.277949000  | -3.572265000 | 3.447511000  |
| C  | 3.355772000  | -3.078683000 | 2.591466000  |
| H  | 2.815622000  | -3.832035000 | 3.169667000  |
| C  | 2.660493000  | -2.260992000 | 1.694358000  |
| H  | 1.580441000  | -2.377204000 | 1.572894000  |
| P  | 2.474459000  | -0.211449000 | -0.231807000 |

**TS4:**

E = -1831.559829

G = -1831.645458

|   |             |              |              |
|---|-------------|--------------|--------------|
| C | 2.254471000 | -0.470028000 | 0.405311000  |
| C | 2.950336000 | 0.256008000  | -0.411062000 |
| H | 2.698638000 | -1.194528000 | 1.099825000  |
| C | 2.915584000 | 1.356097000  | -1.342120000 |
| C | 3.178022000 | 1.173107000  | -2.717399000 |
| C | 2.568648000 | 2.641228000  | -0.867295000 |
| C | 3.085118000 | 2.249312000  | -3.595711000 |
| C | 2.473125000 | 3.712815000  | -1.755734000 |
| C | 2.733819000 | 3.519878000  | -3.117333000 |

|   |              |              |              |
|---|--------------|--------------|--------------|
| H | 3.456415000  | 0.183738000  | -3.085487000 |
| H | 2.370963000  | 2.780840000  | 0.197486000  |
| H | 3.288695000  | 2.103095000  | -4.658802000 |
| H | 2.205439000  | 4.704625000  | -1.384217000 |
| H | 2.670202000  | 4.362914000  | -3.809405000 |
| C | 5.105065000  | -0.227822000 | -0.341838000 |
| C | 5.049455000  | -1.646816000 | -0.512168000 |
| C | 5.298749000  | 0.352217000  | 0.950642000  |
| C | 5.252359000  | -0.485596000 | 2.064250000  |
| C | 5.114201000  | -1.877037000 | 1.922161000  |
| C | 5.024883000  | -2.439605000 | 0.623748000  |
| H | 5.338860000  | 0.384991000  | -1.213653000 |
| H | 5.358804000  | -0.058060000 | 3.064286000  |
| H | 4.956155000  | -3.526219000 | 0.523940000  |
| C | 5.129913000  | -2.777498000 | 3.124018000  |
| H | 6.134442000  | -3.222514000 | 3.237997000  |
| H | 4.900750000  | -2.236022000 | 4.052370000  |
| H | 4.424098000  | -3.614772000 | 3.012775000  |
| C | 5.576049000  | 1.820423000  | 1.077280000  |
| H | 6.644282000  | 2.012725000  | 0.875012000  |
| H | 5.006527000  | 2.407913000  | 0.341063000  |
| H | 5.356540000  | 2.196284000  | 2.086491000  |
| C | 4.949253000  | -2.232180000 | -1.892496000 |
| H | 5.201140000  | -3.301846000 | -1.900432000 |
| H | 3.918166000  | -2.130246000 | -2.275074000 |
| H | 5.614582000  | -1.714264000 | -2.600259000 |
| P | -2.099293000 | 0.321614000  | 0.449214000  |
| N | -5.708924000 | -1.064554000 | -0.721320000 |
| N | -2.776573000 | -3.267025000 | -1.409033000 |
| C | -2.907246000 | 0.677768000  | 2.038650000  |
| C | -3.397759000 | 1.946787000  | 1.972241000  |
| C | -3.222084000 | 2.633216000  | 0.648342000  |
| C | -2.603685000 | 1.892633000  | -0.312887000 |
| C | -3.151383000 | -0.936786000 | -0.323244000 |
| C | -4.430241000 | -1.333933000 | -0.686207000 |
| C | -3.309178000 | -2.165012000 | -0.944558000 |
| C | -6.209465000 | 0.197853000  | -0.161792000 |
| H | -5.374400000 | 0.781718000  | 0.243232000  |
| H | -6.714832000 | 0.777559000  | -0.949615000 |
| H | -6.931875000 | -0.014477000 | 0.641372000  |
| C | -6.707930000 | -1.969950000 | -1.294821000 |
| H | -7.245887000 | -1.462554000 | -2.110357000 |
| H | -6.224939000 | -2.869403000 | -1.691702000 |
| H | -7.433740000 | -2.263370000 | -0.520736000 |
| C | -3.562774000 | -4.333987000 | -2.032916000 |
| H | -4.624984000 | -4.066987000 | -2.046692000 |
| H | -3.220795000 | -4.494697000 | -3.067061000 |
| H | -3.436450000 | -5.270626000 | -1.468174000 |
| C | -1.328825000 | -3.485414000 | -1.319100000 |
| H | -0.909128000 | -3.612859000 | -2.329119000 |
| H | -0.845719000 | -2.627914000 | -0.833035000 |
| H | -1.126551000 | -4.395492000 | -0.733189000 |
| C | -2.888267000 | -0.297104000 | 3.175872000  |
| H | -1.861704000 | -0.462020000 | 3.544767000  |
| H | -3.494097000 | 0.054124000  | 4.021941000  |
| H | -3.281654000 | -1.282173000 | 2.871863000  |
| C | -4.065590000 | 2.673533000  | 3.100968000  |
| H | -3.502064000 | 3.584219000  | 3.362518000  |
| H | -5.076974000 | 3.004426000  | 2.813803000  |
| H | -4.151205000 | 2.059897000  | 4.005879000  |
| C | -3.704589000 | 4.042098000  | 0.473267000  |



|    |              |              |              |
|----|--------------|--------------|--------------|
| H  | -3.201956000 | 4.715131000  | 1.187071000  |
| H  | -3.523228000 | 4.426430000  | -0.537720000 |
| H  | -4.784428000 | 4.119181000  | 0.680394000  |
| C  | -2.228520000 | 2.247265000  | -1.719772000 |
| H  | -2.710254000 | 3.179085000  | -2.045681000 |
| H  | -1.137310000 | 2.380063000  | -1.820178000 |
| H  | -2.521634000 | 1.455738000  | -2.429995000 |
| Au | 0.190252000  | -0.159970000 | 0.410772000  |

**TS5:**

E = -2126.606537

G = -2126.690272

|   |              |              |              |
|---|--------------|--------------|--------------|
| C | 2.398231000  | -0.590662000 | -0.350169000 |
| C | 3.029709000  | 0.229749000  | 0.419333000  |
| H | 2.885412000  | -1.278999000 | -1.053210000 |
| C | 2.961336000  | 1.141469000  | 1.530581000  |
| C | 3.356643000  | 2.492508000  | 1.422076000  |
| C | 2.432377000  | 0.673643000  | 2.755003000  |
| C | 3.209576000  | 3.355496000  | 2.504913000  |
| C | 2.279186000  | 1.547201000  | 3.832368000  |
| C | 2.668486000  | 2.886015000  | 3.710742000  |
| H | 3.780285000  | 2.853922000  | 0.483384000  |
| H | 2.139484000  | -0.374767000 | 2.840185000  |
| H | 3.521146000  | 4.398633000  | 2.415777000  |
| H | 1.869529000  | 1.179917000  | 4.776132000  |
| H | 2.562388000  | 3.564704000  | 4.560285000  |
| C | 5.264437000  | 0.168869000  | 0.013529000  |
| C | 5.235118000  | 0.355043000  | -1.400088000 |
| C | 5.419385000  | -1.128376000 | 0.587744000  |
| C | 5.393442000  | -2.233044000 | -0.262412000 |
| C | 5.295293000  | -2.076776000 | -1.656599000 |
| C | 5.223899000  | -0.773143000 | -2.206723000 |
| H | 5.466590000  | 1.033350000  | 0.647081000  |
| H | 5.478713000  | -3.238178000 | 0.157888000  |
| H | 5.176138000  | -0.661021000 | -3.293271000 |
| C | 5.330875000  | -3.271011000 | -2.567191000 |
| H | 4.669119000  | -3.139628000 | -3.436697000 |
| H | 6.353719000  | -3.402778000 | -2.962807000 |
| H | 5.057660000  | -4.198944000 | -2.045472000 |
| C | 5.626684000  | -1.268664000 | 2.067329000  |
| H | 6.662746000  | -0.992337000 | 2.328681000  |
| H | 4.967878000  | -0.590947000 | 2.633262000  |
| H | 5.458933000  | -2.298759000 | 2.411248000  |
| C | 5.134452000  | 1.740639000  | -1.974895000 |
| H | 5.446706000  | 1.768732000  | -3.028255000 |
| H | 4.087556000  | 2.091276000  | -1.929966000 |
| H | 5.749919000  | 2.459719000  | -1.412969000 |
| P | -1.968692000 | -1.036573000 | 0.134608000  |
| N | -2.871009000 | 1.497942000  | -0.607563000 |
| C | -2.320131000 | -1.785710000 | 1.744508000  |
| C | -2.763361000 | -3.054980000 | 1.512795000  |
| C | -2.955694000 | -3.411623000 | 0.074035000  |
| C | -2.651042000 | -2.425257000 | -0.818042000 |
| C | -3.208226000 | 0.359153000  | -0.080940000 |
| C | -4.677899000 | 0.332974000  | 0.338064000  |
| C | -5.227653000 | 1.571851000  | -0.415842000 |
| H | -5.678036000 | 1.245279000  | -1.364788000 |
| H | -6.011856000 | 2.082030000  | 0.158905000  |
| C | -4.041881000 | 2.503296000  | -0.709458000 |
| C | -4.112906000 | 3.120401000  | -2.105836000 |

|    |              |              |              |
|----|--------------|--------------|--------------|
| H  | -4.973777000 | 3.805099000  | -2.126082000 |
| H  | -4.273116000 | 2.365072000  | -2.884684000 |
| H  | -3.213386000 | 3.705245000  | -2.343641000 |
| C  | -3.847390000 | 3.611793000  | 0.332592000  |
| H  | -2.940815000 | 4.196896000  | 0.126406000  |
| H  | -3.802451000 | 3.228365000  | 1.358748000  |
| H  | -4.706962000 | 4.294205000  | 0.266319000  |
| C  | -5.436067000 | -0.939487000 | -0.073284000 |
| H  | -5.111490000 | -1.812604000 | 0.504293000  |
| H  | -5.319029000 | -1.159256000 | -1.143944000 |
| H  | -6.507287000 | -0.781468000 | 0.123394000  |
| C  | -4.774609000 | 0.503117000  | 1.876400000  |
| H  | -5.829844000 | 0.672009000  | 2.137476000  |
| H  | -4.195676000 | 1.358853000  | 2.250181000  |
| H  | -4.439218000 | -0.401466000 | 2.397074000  |
| C  | -1.541598000 | 1.912992000  | -1.023391000 |
| C  | -1.165132000 | 1.734783000  | -2.371938000 |
| C  | 0.073559000  | 2.256780000  | -2.770382000 |
| H  | 0.387349000  | 2.130697000  | -3.809422000 |
| C  | 0.897364000  | 2.927816000  | -1.869129000 |
| H  | 1.846966000  | 3.348257000  | -2.207699000 |
| C  | 0.524206000  | 3.036755000  | -0.531358000 |
| H  | 1.191446000  | 3.514805000  | 0.187152000  |
| C  | -0.690428000 | 2.513981000  | -0.068402000 |
| C  | -0.970894000 | 2.555679000  | 1.414543000  |
| H  | -1.154223000 | 3.583052000  | 1.764306000  |
| H  | -1.833577000 | 1.947531000  | 1.710475000  |
| H  | -0.093861000 | 2.177445000  | 1.962299000  |
| C  | -1.992910000 | 0.985979000  | -3.387012000 |
| H  | -2.862337000 | 0.477118000  | -2.954657000 |
| H  | -2.357660000 | 1.661696000  | -4.176026000 |
| H  | -1.373932000 | 0.222828000  | -3.882702000 |
| C  | -1.911042000 | -1.155045000 | 3.045951000  |
| H  | -0.870446000 | -1.418868000 | 3.301688000  |
| H  | -1.965480000 | -0.057386000 | 3.010779000  |
| H  | -2.550585000 | -1.491201000 | 3.874938000  |
| C  | -3.010493000 | -4.078240000 | 2.578997000  |
| H  | -2.866416000 | -3.677503000 | 3.589819000  |
| H  | -4.034484000 | -4.479477000 | 2.509242000  |
| H  | -2.329504000 | -4.936810000 | 2.455465000  |
| C  | -3.449102000 | -4.778553000 | -0.290448000 |
| H  | -4.456865000 | -4.944902000 | 0.126307000  |
| H  | -3.504760000 | -4.935288000 | -1.374204000 |
| H  | -2.800174000 | -5.559106000 | 0.137663000  |
| C  | -2.713054000 | -2.441080000 | -2.315389000 |
| H  | -2.817385000 | -3.464701000 | -2.699638000 |
| H  | -3.572248000 | -1.863587000 | -2.698491000 |
| H  | -1.804599000 | -2.008094000 | -2.761197000 |
| Au | 0.321048000  | -0.655363000 | -0.183021000 |

**TS6:**

E = -1831.645911

G = -1831.726124

|   |              |              |              |
|---|--------------|--------------|--------------|
| C | -2.250861000 | -0.676983000 | 0.004009000  |
| C | -2.758796000 | 0.506336000  | -0.003157000 |
| H | -2.823106000 | -1.613829000 | 0.010400000  |
| C | -2.558352000 | 1.925973000  | -0.097687000 |
| C | -2.642435000 | 2.751000000  | 1.045931000  |
| C | -2.219186000 | 2.497540000  | -1.345140000 |

|   |              |              |              |
|---|--------------|--------------|--------------|
| C | -2.384053000 | 4.116268000  | 0.941304000  |
| C | -1.960286000 | 3.865561000  | -1.439274000 |
| C | -2.045331000 | 4.675594000  | -0.299854000 |
| H | -2.917965000 | 2.310317000  | 2.005923000  |
| H | -2.159156000 | 1.857127000  | -2.227269000 |
| H | -2.457363000 | 4.752730000  | 1.826194000  |
| H | -1.705610000 | 4.305148000  | -2.406466000 |
| H | -1.860474000 | 5.749639000  | -0.379900000 |
| C | -5.057214000 | 0.421245000  | 0.161378000  |
| C | -5.146075000 | -0.410700000 | 1.315519000  |
| C | -5.212799000 | -0.113365000 | -1.151590000 |
| C | -5.303211000 | -1.497385000 | -1.293738000 |
| C | -5.322995000 | -2.345590000 | -0.171723000 |
| C | -5.253201000 | -1.781318000 | 1.125154000  |
| H | -5.141301000 | 1.501577000  | 0.292069000  |
| H | -5.392537000 | -1.931374000 | -2.292868000 |
| H | -5.302525000 | -2.444768000 | 1.992893000  |
| C | -5.486639000 | -3.830063000 | -0.334338000 |
| H | -6.546729000 | -4.102966000 | -0.186516000 |
| H | -5.196259000 | -4.172069000 | -1.337727000 |
| H | -4.907742000 | -4.388355000 | 0.416875000  |
| C | -5.316107000 | 0.807951000  | -2.332377000 |
| H | -6.367194000 | 1.116062000  | -2.471136000 |
| H | -4.734563000 | 1.730288000  | -2.185036000 |
| H | -4.991918000 | 0.321712000  | -3.263829000 |
| C | -5.056469000 | 0.188927000  | 2.691886000  |
| H | -5.582095000 | -0.427178000 | 3.435405000  |
| H | -4.001568000 | 0.254439000  | 3.013397000  |
| H | -5.479373000 | 1.204054000  | 2.723234000  |
| P | 2.181722000  | -0.777175000 | 0.067686000  |
| N | 2.471542000  | 2.077771000  | 0.332929000  |
| C | 2.871798000  | -1.713120000 | -1.324419000 |
| C | 3.439799000  | -2.837578000 | -0.805674000 |
| C | 3.481212000  | -2.902096000 | 0.693579000  |
| C | 2.937388000  | -1.830449000 | 1.338520000  |
| C | 3.032813000  | 0.860411000  | 0.113221000  |
| N | 4.351138000  | 1.076505000  | -0.124756000 |
| C | 4.625332000  | 2.432386000  | -0.081585000 |
| C | 3.434797000  | 3.067371000  | 0.209919000  |
| C | 3.148483000  | 4.520796000  | 0.383908000  |
| H | 4.047540000  | 5.110808000  | 0.167624000  |
| H | 2.842221000  | 4.755542000  | 1.416507000  |
| H | 2.353722000  | 4.862984000  | -0.297307000 |
| C | 2.647705000  | -1.307528000 | -2.749618000 |
| H | 2.968212000  | -0.267190000 | -2.931775000 |
| H | 3.202613000  | -1.951392000 | -3.445236000 |
| H | 1.580009000  | -1.365600000 | -3.021379000 |
| C | 4.002755000  | -3.968725000 | -1.611501000 |
| H | 3.920515000  | -3.799923000 | -2.691967000 |
| H | 5.065543000  | -4.132700000 | -1.369067000 |
| H | 3.480295000  | -4.910235000 | -1.375547000 |
| C | 4.079065000  | -4.099549000 | 1.368065000  |
| H | 5.123248000  | -4.251577000 | 1.050303000  |
| H | 4.062623000  | -4.020499000 | 2.461674000  |
| H | 3.530258000  | -5.013186000 | 1.086404000  |

|    |              |              |              |
|----|--------------|--------------|--------------|
| C  | 2.777574000  | -1.557621000 | 2.803367000  |
| H  | 3.366167000  | -2.257681000 | 3.411395000  |
| H  | 3.105500000  | -0.537456000 | 3.064982000  |
| H  | 1.723067000  | -1.650320000 | 3.115087000  |
| Au | -0.162174000 | -0.710910000 | 0.042167000  |
| C  | 5.984308000  | 3.000237000  | -0.313672000 |
| H  | 6.391919000  | 2.689494000  | -1.288420000 |
| H  | 5.944878000  | 4.096280000  | -0.303000000 |
| H  | 6.694436000  | 2.688040000  | 0.469636000  |
| C  | 1.070733000  | 2.357053000  | 0.671108000  |
| H  | 0.727671000  | 1.674923000  | 1.457021000  |
| H  | 0.993962000  | 3.381379000  | 1.046937000  |
| H  | 0.425861000  | 2.257515000  | -0.212766000 |
| C  | 5.357450000  | 0.043658000  | -0.385592000 |
| H  | 5.313687000  | -0.275259000 | -1.435636000 |
| H  | 6.349904000  | 0.451894000  | -0.169015000 |
| H  | 5.177556000  | -0.816214000 | 0.268647000  |

**TS7:**

E = -1982.851787

G = -1982.936556

|    |              |              |              |
|----|--------------|--------------|--------------|
| C  | 2.362586000  | -0.903318000 | -0.072655000 |
| C  | 3.072614000  | 0.175322000  | -0.098134000 |
| H  | 2.762975000  | -1.923800000 | -0.108655000 |
| C  | 3.072265000  | 1.610464000  | 0.037182000  |
| C  | 3.328104000  | 2.456365000  | -1.063470000 |
| C  | 2.741388000  | 2.178917000  | 1.288143000  |
| C  | 3.241950000  | 3.838656000  | -0.916267000 |
| C  | 2.652362000  | 3.564712000  | 1.425073000  |
| C  | 2.904945000  | 4.394826000  | 0.326251000  |
| H  | 3.593252000  | 2.018728000  | -2.027729000 |
| H  | 2.546160000  | 1.521810000  | 2.137956000  |
| H  | 3.440715000  | 4.489584000  | -1.770548000 |
| H  | 2.395086000  | 3.999662000  | 2.393536000  |
| H  | 2.849516000  | 5.480304000  | 0.439373000  |
| C  | 5.264912000  | -0.251459000 | -0.373482000 |
| C  | 5.191208000  | -1.110701000 | -1.511187000 |
| C  | 5.415346000  | -0.780368000 | 0.943885000  |
| C  | 5.324740000  | -2.161544000 | 1.115032000  |
| C  | 5.176745000  | -3.023006000 | 0.014422000  |
| C  | 5.121595000  | -2.478132000 | -1.292365000 |
| H  | 5.510799000  | 0.799428000  | -0.534769000 |
| H  | 5.402661000  | -2.585208000 | 2.119368000  |
| H  | 5.040087000  | -3.158514000 | -2.144427000 |
| C  | 5.144059000  | -4.513181000 | 0.202590000  |
| H  | 6.134816000  | -4.938030000 | -0.037510000 |
| H  | 4.904257000  | -4.796358000 | 1.237009000  |
| H  | 4.421980000  | -4.991692000 | -0.476688000 |
| C  | 5.697375000  | 0.140927000  | 2.094000000  |
| H  | 6.775792000  | 0.375218000  | 2.125259000  |
| H  | 5.169800000  | 1.100974000  | 1.986797000  |
| H  | 5.429006000  | -0.311039000 | 3.059410000  |
| C  | 5.117141000  | -0.524000000 | -2.893204000 |
| H  | 5.406821000  | -1.254888000 | -3.661226000 |
| H  | 4.083354000  | -0.204385000 | -3.115472000 |
| H  | 5.765383000  | 0.359774000  | -2.993956000 |
| Au | 0.311376000  | -0.516125000 | 0.090678000  |
| P  | -1.905655000 | 0.210738000  | 0.354899000  |
| C  | -2.091752000 | 1.953682000  | -0.157010000 |

|   |              |              |              |
|---|--------------|--------------|--------------|
| C | -0.985722000 | 2.809896000  | -0.002179000 |
| C | -3.301248000 | 2.462155000  | -0.665917000 |
| C | -1.094944000 | 4.158454000  | -0.347822000 |
| C | -3.399793000 | 3.811249000  | -1.013523000 |
| C | -2.298376000 | 4.660074000  | -0.853644000 |
| H | -0.035117000 | 2.432838000  | 0.383869000  |
| H | -4.170888000 | 1.812149000  | -0.792203000 |
| H | -0.230463000 | 4.814478000  | -0.225054000 |
| H | -4.340589000 | 4.203365000  | -1.406681000 |
| H | -2.379990000 | 5.714737000  | -1.126473000 |
| C | -2.611408000 | -0.010539000 | 2.021645000  |
| C | -3.697761000 | 0.765687000  | 2.462092000  |
| C | -2.074320000 | -1.009100000 | 2.852947000  |
| C | -4.251707000 | 0.527469000  | 3.721640000  |
| C | -2.638196000 | -1.243043000 | 4.110335000  |
| C | -3.726455000 | -0.477808000 | 4.543014000  |
| H | -4.104673000 | 1.561658000  | 1.834652000  |
| H | -1.217030000 | -1.601845000 | 2.522356000  |
| H | -5.091634000 | 1.134112000  | 4.067758000  |
| H | -2.219622000 | -2.017056000 | 4.757527000  |
| H | -4.160479000 | -0.656729000 | 5.529554000  |
| C | -3.081143000 | -0.658876000 | -0.713520000 |
| C | -4.093436000 | -1.587551000 | -0.903006000 |
| C | -3.523402000 | -0.901287000 | -2.002887000 |
| N | -3.426805000 | -0.618792000 | -3.278199000 |
| N | -4.940574000 | -2.448047000 | -0.396431000 |
| C | -2.434973000 | 0.358634000  | -3.742397000 |
| H | -1.872844000 | 0.758721000  | -2.889677000 |
| H | -1.739716000 | -0.123000000 | -4.447347000 |
| H | -2.943711000 | 1.189117000  | -4.255721000 |
| C | -4.267434000 | -1.240156000 | -4.303666000 |
| H | -3.639775000 | -1.795226000 | -5.018135000 |
| H | -4.982100000 | -1.931251000 | -3.843601000 |
| H | -4.824152000 | -0.463860000 | -4.851047000 |
| C | -5.867551000 | -3.227637000 | -1.220207000 |
| H | -5.713656000 | -3.006953000 | -2.282054000 |
| H | -5.700250000 | -4.302711000 | -1.052231000 |
| H | -6.906714000 | -2.985169000 | -0.948434000 |
| C | -5.007807000 | -2.672381000 | 1.053235000  |
| H | -6.023160000 | -2.446603000 | 1.413810000  |
| H | -4.779103000 | -3.726024000 | 1.276209000  |
| H | -4.290465000 | -2.026079000 | 1.570853000  |

**TS8:**

E = -1099.524150

G = -1098.056338

|   |              |              |              |
|---|--------------|--------------|--------------|
| C | -0.920449000 | -0.642588000 | 0.022255000  |
| C | -1.561177000 | 0.489077000  | 0.100301000  |
| H | -1.441764000 | -1.606568000 | -0.026653000 |
| C | -1.282801000 | 1.919247000  | 0.026094000  |
| C | -1.599252000 | 2.801953000  | 1.077474000  |
| C | -0.616374000 | 2.421288000  | -1.112187000 |
| C | -1.247862000 | 4.148500000  | 0.997862000  |
| C | -0.263615000 | 3.770310000  | -1.185108000 |
| C | -0.579681000 | 4.636130000  | -0.132777000 |
| H | -2.111612000 | 2.422803000  | 1.963986000  |
| H | -0.368354000 | 1.735771000  | -1.925081000 |
| H | -1.490941000 | 4.822405000  | 1.822526000  |
| H | 0.253016000  | 4.148505000  | -2.070552000 |
| H | -0.309715000 | 5.693095000  | -0.193519000 |

|    |              |              |              |
|----|--------------|--------------|--------------|
| C  | -3.602557000 | 0.352235000  | 0.238012000  |
| C  | -3.768798000 | -0.565990000 | 1.332944000  |
| C  | -3.803995000 | -0.083400000 | -1.114380000 |
| C  | -3.937467000 | -1.449013000 | -1.356084000 |
| C  | -3.984219000 | -2.371192000 | -0.297667000 |
| C  | -3.920784000 | -1.907999000 | 1.041854000  |
| H  | -3.769607000 | 1.410043000  | 0.445858000  |
| H  | -4.032822000 | -1.808163000 | -2.383484000 |
| H  | -4.003824000 | -2.634291000 | 1.854809000  |
| C  | -4.146573000 | -3.840678000 | -0.559190000 |
| H  | -3.342103000 | -4.414843000 | -0.070900000 |
| H  | -5.095367000 | -4.200369000 | -0.125868000 |
| H  | -4.144400000 | -4.077226000 | -1.631794000 |
| C  | -3.869486000 | 0.927556000  | -2.218722000 |
| H  | -4.839751000 | 1.452766000  | -2.185527000 |
| H  | -3.090793000 | 1.697953000  | -2.104780000 |
| H  | -3.769539000 | 0.462401000  | -3.209104000 |
| C  | -3.673399000 | -0.062146000 | 2.743069000  |
| H  | -4.043604000 | -0.801433000 | 3.466819000  |
| H  | -2.618910000 | 0.151294000  | 2.991606000  |
| H  | -4.238590000 | 0.873379000  | 2.877210000  |
| N  | 3.970643000  | 0.648537000  | 0.040189000  |
| C  | 3.222517000  | -0.486742000 | 0.015237000  |
| N  | 4.123856000  | -1.502492000 | -0.009877000 |
| C  | 5.417847000  | -1.011447000 | 0.001350000  |
| C  | 5.321010000  | 0.345788000  | 0.034745000  |
| H  | 6.090861000  | 1.112623000  | 0.053582000  |
| Au | 1.160831000  | -0.593318000 | 0.022898000  |
| H  | 6.288376000  | -1.661741000 | -0.018651000 |
| C  | 3.449678000  | 2.009457000  | 0.109519000  |
| H  | 3.602556000  | 2.426412000  | 1.116223000  |
| H  | 3.966110000  | 2.640946000  | -0.627138000 |
| H  | 2.375969000  | 2.000576000  | -0.114661000 |
| C  | 3.803146000  | -2.924182000 | -0.053593000 |
| H  | 4.190449000  | -3.371118000 | -0.980985000 |
| H  | 4.248881000  | -3.436815000 | 0.811198000  |
| H  | 2.714081000  | -3.045546000 | -0.022303000 |

**TS9:**

E = -902.896540

G = -902.949339

|   |              |              |              |
|---|--------------|--------------|--------------|
| C | -1.590561000 | -0.644599000 | 0.017422000  |
| C | -2.254408000 | 0.473164000  | 0.101619000  |
| H | -2.091986000 | -1.618936000 | -0.034310000 |
| C | -2.007411000 | 1.909060000  | 0.032228000  |
| C | -2.343437000 | 2.781366000  | 1.086302000  |
| C | -1.351401000 | 2.428873000  | -1.104128000 |
| C | -2.021634000 | 4.135451000  | 1.010830000  |
| C | -1.028289000 | 3.785464000  | -1.172783000 |
| C | -1.363935000 | 4.640965000  | -0.118157000 |
| H | -2.847568000 | 2.388464000  | 1.971539000  |
| H | -1.087492000 | 1.751349000  | -1.918683000 |
| H | -2.279539000 | 4.801379000  | 1.837456000  |
| H | -0.519125000 | 4.177359000  | -2.056565000 |
| H | -1.117138000 | 5.703759000  | -0.175564000 |
| C | -4.292979000 | 0.291005000  | 0.244256000  |
| C | -4.435375000 | -0.633840000 | 1.336951000  |
| C | -4.487961000 | -0.145096000 | -1.108947000 |
| C | -4.590715000 | -1.512669000 | -1.354354000 |
| C | -4.613111000 | -2.438787000 | -0.298472000 |
| C | -4.557088000 | -1.978194000 | 1.042244000  |

|    |              |              |              |
|----|--------------|--------------|--------------|
| H  | -4.482822000 | 1.344253000  | 0.455680000  |
| H  | -4.680203000 | -1.871005000 | -2.382560000 |
| H  | -4.621121000 | -2.708621000 | 1.853211000  |
| C  | -4.741580000 | -3.910906000 | -0.563902000 |
| H  | -5.681210000 | -4.293769000 | -0.130437000 |
| H  | -4.735318000 | -4.144398000 | -1.637156000 |
| H  | -3.923384000 | -4.467570000 | -0.078164000 |
| C  | -4.577358000 | 0.867719000  | -2.209924000 |
| H  | -5.554555000 | 1.379132000  | -2.167503000 |
| H  | -3.808648000 | 1.648699000  | -2.099606000 |
| H  | -4.478267000 | 0.406856000  | -3.202369000 |
| C  | -4.347840000 | -0.131928000 | 2.748289000  |
| H  | -4.699330000 | -0.881415000 | 3.470870000  |
| H  | -3.297843000 | 0.104690000  | 2.994905000  |
| H  | -4.933752000 | 0.790176000  | 2.886451000  |
| N  | 3.268627000  | 0.732817000  | 0.025330000  |
| C  | 2.548804000  | -0.421256000 | 0.009900000  |
| N  | 3.447072000  | -1.440447000 | -0.005244000 |
| C  | 4.748561000  | -0.943906000 | 0.001915000  |
| C  | 4.633631000  | 0.455549000  | 0.022780000  |
| Au | 0.489715000  | -0.556417000 | 0.015917000  |
| C  | 2.730048000  | 2.083825000  | 0.050133000  |
| H  | 3.029065000  | 2.593606000  | 0.978666000  |
| H  | 3.111505000  | 2.654517000  | -0.810024000 |
| H  | 1.635334000  | 2.042946000  | -0.002502000 |
| C  | 3.135456000  | -2.860512000 | -0.025400000 |
| H  | 3.556490000  | -3.326380000 | -0.929231000 |
| H  | 3.560247000  | -3.352278000 | 0.862790000  |
| H  | 2.046967000  | -2.990803000 | -0.024857000 |
| C  | 5.759644000  | 1.283324000  | 0.036939000  |
| H  | 5.672700000  | 2.370693000  | 0.055102000  |
| C  | 5.994132000  | -1.577655000 | -0.007455000 |
| H  | 6.085056000  | -2.664727000 | -0.023937000 |
| C  | 7.004770000  | 0.652391000  | 0.027810000  |
| H  | 7.911561000  | 1.260797000  | 0.038458000  |
| C  | 7.119936000  | -0.752641000 | 0.005737000  |
| H  | 8.113643000  | -1.205392000 | -0.000675000 |

**TS10:**

E = -907.903441

G = -907.957771

|   |              |              |              |
|---|--------------|--------------|--------------|
| C | -0.128888000 | -0.623482000 | -0.008569000 |
| C | -0.674912000 | 0.551116000  | 0.078963000  |
| H | -0.724736000 | -1.544045000 | -0.070559000 |
| C | -0.443487000 | 1.970966000  | 0.042695000  |
| C | -0.632621000 | 2.780167000  | 1.185221000  |
| C | 0.024699000  | 2.557292000  | -1.155376000 |
| C | -0.348672000 | 4.141097000  | 1.129713000  |
| C | 0.310148000  | 3.921791000  | -1.199414000 |
| C | 0.121105000  | 4.713782000  | -0.061476000 |
| H | -0.997916000 | 2.329309000  | 2.109828000  |
| H | 0.172308000  | 1.929018000  | -2.036109000 |
| H | -0.488108000 | 4.762468000  | 2.016985000  |
| H | 0.679988000  | 4.369878000  | -2.124316000 |
| H | 0.341131000  | 5.783238000  | -0.100078000 |
| C | -2.857005000 | 0.429686000  | 0.262359000  |
| C | -2.970320000 | -0.498089000 | 1.346983000  |
| C | -3.055600000 | 0.008941000  | -1.089967000 |
| C | -3.179410000 | -1.356266000 | -1.345823000 |
| C | -3.205488000 | -2.292486000 | -0.298121000 |
| C | -3.113562000 | -1.841643000 | 1.043101000  |

|    |              |              |              |
|----|--------------|--------------|--------------|
| H  | -2.964272000 | 1.492188000  | 0.484460000  |
| H  | -3.287920000 | -1.703495000 | -2.376180000 |
| H  | -3.170272000 | -2.576425000 | 1.850762000  |
| C  | -3.382255000 | -3.757827000 | -0.575132000 |
| H  | -2.655097000 | -4.360701000 | -0.008282000 |
| H  | -4.384600000 | -4.082431000 | -0.245434000 |
| H  | -3.283143000 | -3.995298000 | -1.643097000 |
| C  | -3.152473000 | 1.030259000  | -2.183685000 |
| H  | -4.166135000 | 1.467580000  | -2.193075000 |
| H  | -2.452230000 | 1.864465000  | -2.023829000 |
| H  | -2.968506000 | 0.591726000  | -3.174497000 |
| C  | -2.850461000 | -0.014510000 | 2.764234000  |
| H  | -3.268452000 | -0.738959000 | 3.477136000  |
| H  | -1.787224000 | 0.128929000  | 3.026365000  |
| H  | -3.359231000 | 0.950742000  | 2.908712000  |
| C  | 3.905676000  | -0.989109000 | 0.012811000  |
| Au | 1.928534000  | -0.786505000 | 0.003830000  |
| O  | 5.026425000  | -1.115547000 | 0.015945000  |

**INT1 :**

E = -1831.202160

G = -1831.278010

|    |              |              |              |
|----|--------------|--------------|--------------|
| C  | -2.160156000 | -0.615856000 | -0.004316000 |
| C  | -2.980678000 | 0.440681000  | 0.108194000  |
| C  | -4.591953000 | 0.217666000  | 0.259776000  |
| C  | -4.866840000 | -0.744023000 | 1.355023000  |
| C  | -4.989626000 | -0.176842000 | -1.107186000 |
| C  | -5.305114000 | -1.502396000 | -1.360785000 |
| C  | -5.423120000 | -2.432412000 | -0.311176000 |
| C  | -5.238010000 | -2.024511000 | 1.044188000  |
| Au | -0.095441000 | -0.521018000 | -0.016392000 |
| P  | 2.255347000  | -0.283359000 | 0.003580000  |
| H  | -4.982614000 | 1.212541000  | 0.511565000  |
| H  | -5.505300000 | -1.826698000 | -2.384351000 |
| H  | -5.392505000 | -2.759561000 | 1.837980000  |
| H  | -2.634920000 | -1.607468000 | -0.030485000 |
| C  | 2.994471000  | -0.520876000 | 1.661662000  |
| C  | 4.030486000  | 0.294697000  | 2.143037000  |
| C  | 2.517227000  | -1.579902000 | 2.453362000  |
| C  | 4.586591000  | 0.046151000  | 3.401729000  |
| C  | 3.081010000  | -1.827475000 | 3.706137000  |
| C  | 4.115978000  | -1.014189000 | 4.181855000  |
| H  | 4.403381000  | 1.125149000  | 1.539808000  |
| H  | 1.701852000  | -2.210295000 | 2.087302000  |
| H  | 5.391573000  | 0.684873000  | 3.773030000  |
| H  | 2.708358000  | -2.653827000 | 4.316156000  |
| H  | 4.553076000  | -1.205336000 | 5.164911000  |
| C  | 2.752670000  | 1.399957000  | -0.525468000 |
| C  | 1.959639000  | 2.487571000  | -0.119693000 |
| C  | 3.904696000  | 1.630683000  | -1.294454000 |
| C  | 2.323600000  | 3.789477000  | -0.468405000 |
| C  | 4.261114000  | 2.936491000  | -1.645053000 |
| C  | 3.474534000  | 4.016108000  | -1.231264000 |
| H  | 1.049287000  | 2.319320000  | 0.461619000  |
| H  | 4.523106000  | 0.793241000  | -1.625005000 |
| H  | 1.700191000  | 4.627409000  | -0.147641000 |
| H  | 5.157438000  | 3.109537000  | -2.245447000 |
| H  | 3.756585000  | 5.035021000  | -1.507563000 |
| C  | 3.145434000  | -1.435504000 | -1.105537000 |
| C  | 2.574887000  | -1.725306000 | -2.357015000 |
| C  | 4.379352000  | -2.006135000 | -0.755069000 |



|   |              |              |              |
|---|--------------|--------------|--------------|
| C | 3.238357000  | -2.566790000 | -3.251732000 |
| C | 5.035910000  | -2.853722000 | -1.652580000 |
| C | 4.469136000  | -3.132575000 | -2.899859000 |
| H | 1.607935000  | -1.292346000 | -2.628837000 |
| H | 4.827840000  | -1.793584000 | 0.217769000  |
| H | 2.791372000  | -2.787588000 | -4.223979000 |
| H | 5.994533000  | -3.298052000 | -1.374327000 |
| H | 4.984893000  | -3.796141000 | -3.598171000 |
| C | -2.583968000 | 1.873247000  | 0.044923000  |
| C | -3.005438000 | 2.799914000  | 1.017279000  |
| C | -1.740629000 | 2.327141000  | -0.988108000 |
| C | -2.575915000 | 4.127168000  | 0.976606000  |
| C | -1.316175000 | 3.657352000  | -1.033607000 |
| C | -1.729685000 | 4.561102000  | -0.050830000 |
| H | -3.654253000 | 2.475345000  | 1.835364000  |
| H | -1.415612000 | 1.622251000  | -1.755820000 |
| H | -2.899182000 | 4.825917000  | 1.751838000  |
| H | -0.658967000 | 3.986205000  | -1.841738000 |
| H | -1.401268000 | 5.602615000  | -0.086953000 |
| C | -5.775238000 | -3.857269000 | -0.589459000 |
| H | -6.671952000 | -4.146961000 | -0.015494000 |
| H | -5.951417000 | -4.052366000 | -1.655164000 |
| H | -4.961474000 | -4.515693000 | -0.238189000 |
| C | -5.028107000 | 0.861789000  | -2.176854000 |
| H | -5.910177000 | 1.507819000  | -2.016752000 |
| H | -4.150012000 | 1.524757000  | -2.129463000 |
| H | -5.102712000 | 0.421193000  | -3.180009000 |
| C | -4.621611000 | -0.291758000 | 2.755455000  |
| H | -4.883068000 | -1.061248000 | 3.493896000  |
| H | -3.552760000 | -0.039173000 | 2.871571000  |
| H | -5.190530000 | 0.626030000  | 2.979220000  |

**INT2 :**

E = -2057.024912

G = -2057.104728

|    |              |              |              |
|----|--------------|--------------|--------------|
| C  | -2.242401000 | -0.411837000 | -0.422398000 |
| C  | -3.114026000 | 0.470283000  | 0.094865000  |
| C  | -4.707875000 | 0.251926000  | -0.122742000 |
| C  | -5.090847000 | -1.126160000 | 0.277236000  |
| C  | -4.907557000 | 0.627884000  | -1.540001000 |
| C  | -5.157710000 | -0.364703000 | -2.472949000 |
| C  | -5.389487000 | -1.694907000 | -2.072914000 |
| C  | -5.386964000 | -2.048463000 | -0.690426000 |
| Au | -0.200917000 | -0.411095000 | -0.127039000 |
| P  | 2.076392000  | -0.385158000 | 0.264056000  |
| H  | -5.182313000 | 0.985715000  | 0.543177000  |
| H  | -5.214031000 | -0.110950000 | -3.533747000 |
| H  | -5.622003000 | -3.079076000 | -0.413197000 |
| H  | -2.669191000 | -1.236286000 | -1.011392000 |
| C  | -2.769446000 | 1.717718000  | 0.826171000  |
| C  | -3.397132000 | 2.060336000  | 2.038758000  |
| C  | -1.768322000 | 2.575032000  | 0.327777000  |
| C  | -3.015380000 | 3.201103000  | 2.746273000  |
| C  | -1.387047000 | 3.717621000  | 1.034211000  |
| C  | -2.006799000 | 4.032943000  | 2.246434000  |
| H  | -4.173121000 | 1.412606000  | 2.456173000  |
| H  | -1.284107000 | 2.338003000  | -0.621608000 |
| H  | -3.502142000 | 3.438658000  | 3.695183000  |
| H  | -0.599434000 | 4.357377000  | 0.632589000  |
| H  | -1.709395000 | 4.927071000  | 2.799300000  |

|   |              |              |              |
|---|--------------|--------------|--------------|
| C | -5.667284000 | -2.757876000 | -3.084482000 |
| H | -6.611250000 | -3.276118000 | -2.844853000 |
| H | -5.718819000 | -2.368406000 | -4.109386000 |
| H | -4.876107000 | -3.526965000 | -3.037252000 |
| C | -4.817402000 | 2.066274000  | -1.923036000 |
| H | -5.708505000 | 2.596998000  | -1.542319000 |
| H | -3.948285000 | 2.554301000  | -1.453791000 |
| H | -4.773003000 | 2.203014000  | -3.011673000 |
| C | -5.039758000 | -1.466883000 | 1.728480000  |
| H | -5.360183000 | -2.498315000 | 1.926184000  |
| H | -4.005395000 | -1.339944000 | 2.093484000  |
| H | -5.669326000 | -0.778169000 | 2.316369000  |
| O | 2.664754000  | -1.423111000 | 1.369917000  |
| O | 2.733202000  | 0.945753000  | 0.923073000  |
| O | 2.912894000  | -0.645796000 | -1.103411000 |
| C | 2.450885000  | 2.247751000  | 0.526607000  |
| C | 2.494626000  | 3.224657000  | 1.523589000  |
| C | 2.168033000  | 2.580283000  | -0.802086000 |
| C | 2.262046000  | 4.557933000  | 1.181530000  |
| H | 2.720505000  | 2.924335000  | 2.547994000  |
| C | 1.923165000  | 3.919146000  | -1.127204000 |
| H | 2.166169000  | 1.813067000  | -1.577651000 |
| C | 1.973643000  | 4.910126000  | -0.142703000 |
| H | 2.306667000  | 5.326701000  | 1.956549000  |
| H | 1.708940000  | 4.186162000  | -2.164789000 |
| H | 1.796713000  | 5.955061000  | -0.406821000 |
| C | 4.275957000  | -0.415364000 | -1.337356000 |
| C | 4.604741000  | 0.099081000  | -2.591942000 |
| C | 5.254996000  | -0.700196000 | -0.382941000 |
| C | 5.946933000  | 0.334419000  | -2.899297000 |
| H | 3.808626000  | 0.300786000  | -3.310970000 |
| C | 6.593460000  | -0.453624000 | -0.704763000 |
| H | 4.979575000  | -1.105725000 | 0.590344000  |
| C | 6.943503000  | 0.061274000  | -1.956461000 |
| H | 6.213021000  | 0.734436000  | -3.880492000 |
| H | 7.367750000  | -0.670786000 | 0.034754000  |
| H | 7.992121000  | 0.247925000  | -2.197955000 |
| C | 2.155880000  | -2.718476000 | 1.493519000  |
| C | 1.695623000  | -3.112832000 | 2.749936000  |
| C | 2.138163000  | -3.588581000 | 0.400423000  |
| C | 1.209505000  | -4.412259000 | 2.914566000  |
| H | 1.731264000  | -2.401716000 | 3.577031000  |
| C | 1.641209000  | -4.883836000 | 0.578770000  |
| H | 2.520845000  | -3.259617000 | -0.567486000 |
| C | 1.178507000  | -5.298064000 | 1.831285000  |
| H | 0.854179000  | -4.733619000 | 3.896517000  |
| H | 1.627060000  | -5.573877000 | -0.268177000 |
| H | 0.800307000  | -6.313876000 | 1.966133000  |

**INT3:**

E = -1679.911591

G = -1679.985061

|   |             |              |              |
|---|-------------|--------------|--------------|
| C | 1.954894000 | -0.503034000 | 0.264186000  |
| C | 2.758389000 | 0.501703000  | -0.120247000 |
| H | 2.447082000 | -1.398253000 | 0.671385000  |
| C | 2.333156000 | 1.751895000  | -0.805063000 |
| C | 1.459320000 | 1.689389000  | -1.908666000 |
| C | 2.756618000 | 3.018670000  | -0.361477000 |
| C | 1.006322000 | 2.855957000  | -2.529821000 |
| C | 2.298362000 | 4.184578000  | -0.976885000 |

|    |              |              |              |
|----|--------------|--------------|--------------|
| C  | 1.420409000  | 4.107383000  | -2.064081000 |
| H  | 1.137595000  | 0.712518000  | -2.275261000 |
| H  | 3.429253000  | 3.099666000  | 0.496837000  |
| H  | 0.332638000  | 2.785125000  | -3.387229000 |
| H  | 2.624110000  | 5.158584000  | -0.604111000 |
| H  | 1.068136000  | 5.019985000  | -2.550446000 |
| C  | 4.373142000  | 0.385529000  | 0.084426000  |
| C  | 4.766179000  | -0.562557000 | -0.978873000 |
| C  | 4.678842000  | 0.004787000  | 1.485324000  |
| C  | 5.076788000  | -1.275933000 | 1.759887000  |
| C  | 5.261647000  | -2.232700000 | 0.716829000  |
| C  | 5.111801000  | -1.858940000 | -0.631894000 |
| H  | 4.749279000  | 1.394629000  | -0.130659000 |
| H  | 5.255271000  | -1.586143000 | 2.792470000  |
| H  | 5.310760000  | -2.595340000 | -1.413587000 |
| C  | 5.646539000  | -3.628499000 | 1.084095000  |
| H  | 6.547699000  | -3.620343000 | 1.720534000  |
| H  | 4.846446000  | -4.085016000 | 1.693042000  |
| H  | 5.829114000  | -4.264745000 | 0.208479000  |
| C  | 4.436602000  | 1.021194000  | 2.550163000  |
| H  | 4.993237000  | 1.950189000  | 2.342045000  |
| H  | 3.365001000  | 1.288036000  | 2.557895000  |
| H  | 4.715580000  | 0.655272000  | 3.547172000  |
| C  | 4.766000000  | -0.098468000 | -2.396260000 |
| H  | 4.856147000  | -0.931973000 | -3.105526000 |
| H  | 3.862850000  | 0.487433000  | -2.628421000 |
| H  | 5.621955000  | 0.582719000  | -2.551542000 |
| Au | -0.112114000 | -0.449436000 | 0.258021000  |
| C  | -3.026774000 | 1.460050000  | 0.037314000  |
| C  | -3.730420000 | 1.817472000  | 1.144369000  |
| C  | -3.904669000 | 0.729861000  | 2.160739000  |
| C  | -3.327798000 | -0.457914000 | 1.835540000  |
| C  | -2.655855000 | 2.263090000  | -1.171190000 |
| H  | -2.956260000 | 1.743102000  | -2.097308000 |
| H  | -1.564582000 | 2.416888000  | -1.229559000 |
| H  | -3.136089000 | 3.251631000  | -1.172734000 |
| C  | -4.315130000 | 3.176170000  | 1.402448000  |
| H  | -4.122280000 | 3.877212000  | 0.580555000  |
| H  | -3.898529000 | 3.613834000  | 2.324890000  |
| H  | -5.406231000 | 3.116550000  | 1.548542000  |
| C  | -4.674445000 | 1.008500000  | 3.419407000  |
| H  | -4.733804000 | 0.132025000  | 4.076962000  |
| H  | -5.703457000 | 1.330565000  | 3.189373000  |
| H  | -4.209176000 | 1.829076000  | 3.990394000  |
| C  | -3.311047000 | -1.757557000 | 2.579207000  |
| H  | -3.919890000 | -1.718493000 | 3.493289000  |
| H  | -2.284528000 | -2.039861000 | 2.869086000  |
| H  | -3.701935000 | -2.576523000 | 1.950789000  |
| C  | -3.341285000 | -1.281000000 | -0.984598000 |
| C  | -4.734466000 | -1.149236000 | -1.124236000 |
| H  | -5.278292000 | -0.436781000 | -0.498133000 |
| C  | -5.418203000 | -1.926163000 | -2.059396000 |
| H  | -6.500555000 | -1.821522000 | -2.166263000 |
| C  | -4.718564000 | -2.839035000 | -2.859323000 |
| H  | -5.256698000 | -3.446757000 | -3.590853000 |
| C  | -3.334703000 | -2.973586000 | -2.722523000 |
| H  | -2.788914000 | -3.686380000 | -3.345299000 |
| C  | -2.643581000 | -2.196141000 | -1.786932000 |
| H  | -1.560938000 | -2.301943000 | -1.679694000 |
| P  | -2.461426000 | -0.256156000 | 0.248959000  |

**INT4:**

E = -1831.568322

G = -1831.651459

|    |              |              |              |
|----|--------------|--------------|--------------|
| P  | -2.056526000 | -0.269365000 | -0.509947000 |
| N  | -5.681703000 | 1.175428000  | 0.568766000  |
| N  | -2.741145000 | 3.397317000  | 1.169998000  |
| C  | -2.877260000 | -0.711099000 | -2.072574000 |
| C  | -3.375122000 | -1.971615000 | -1.935832000 |
| C  | -3.204538000 | -2.581881000 | -0.576023000 |
| C  | -2.582351000 | -1.789714000 | 0.340568000  |
| C  | -3.122641000 | 1.023092000  | 0.189615000  |
| C  | -4.401340000 | 1.440637000  | 0.527610000  |
| C  | -3.279641000 | 2.278097000  | 0.753061000  |
| C  | -6.180768000 | -0.111151000 | 0.067008000  |
| H  | -5.342870000 | -0.717685000 | -0.296696000 |
| H  | -6.698732000 | -0.648906000 | 0.876170000  |
| H  | -6.891782000 | 0.062393000  | -0.755584000 |
| C  | -6.680724000 | 2.108068000  | 1.094509000  |
| H  | -7.218134000 | 1.644523000  | 1.936259000  |
| H  | -6.198291000 | 3.027832000  | 1.442876000  |
| H  | -7.407740000 | 2.360335000  | 0.307030000  |
| C  | -3.522428000 | 4.495419000  | 1.741394000  |
| H  | -4.586226000 | 4.234841000  | 1.764293000  |
| H  | -3.183428000 | 4.701992000  | 2.768489000  |
| H  | -3.390213000 | 5.405193000  | 1.135308000  |
| C  | -1.291697000 | 3.599135000  | 1.075378000  |
| H  | -0.875277000 | 3.773655000  | 2.079821000  |
| H  | -0.812946000 | 2.714285000  | 0.635383000  |
| H  | -1.079393000 | 4.477149000  | 0.445457000  |
| C  | -2.854784000 | 0.196676000  | -3.264143000 |
| H  | -1.826244000 | 0.345526000  | -3.634226000 |
| H  | -3.453701000 | -0.204079000 | -4.093066000 |
| H  | -3.253848000 | 1.195989000  | -3.019175000 |
| C  | -4.046844000 | -2.757895000 | -3.022325000 |
| H  | -3.494306000 | -3.689794000 | -3.225743000 |
| H  | -5.063843000 | -3.058159000 | -2.721213000 |
| H  | -4.121249000 | -2.199186000 | -3.963178000 |
| C  | -3.694599000 | -3.976574000 | -0.321914000 |
| H  | -3.191108000 | -4.692604000 | -0.991992000 |
| H  | -3.520598000 | -4.302249000 | 0.710938000  |
| H  | -4.773594000 | -4.061680000 | -0.530432000 |
| C  | -2.209595000 | -2.064655000 | 1.765665000  |
| H  | -2.701989000 | -2.969339000 | 2.147879000  |
| H  | -1.119612000 | -2.202374000 | 1.873124000  |
| H  | -2.491979000 | -1.227917000 | 2.426782000  |
| C  | 2.301208000  | 0.414931000  | -0.377144000 |
| C  | 3.123299000  | -0.229443000 | 0.473125000  |
| C  | 4.694517000  | 0.075304000  | 0.456235000  |
| C  | 4.949652000  | 1.542387000  | 0.535110000  |
| C  | 5.230589000  | -0.635916000 | -0.738063000 |
| C  | 5.701276000  | 0.096449000  | -1.810311000 |
| C  | 5.826502000  | 1.500857000  | -1.738506000 |
| C  | 5.468502000  | 2.200301000  | -0.547598000 |
| Au | 0.255355000  | 0.173422000  | -0.458787000 |
| H  | 5.091761000  | -0.402823000 | 1.365688000  |
| H  | 6.026737000  | -0.417618000 | -2.717454000 |
| H  | 5.626524000  | 3.280970000  | -0.509287000 |
| H  | 2.768754000  | 1.127793000  | -1.071067000 |
| C  | 2.707635000  | -1.289027000 | 1.433900000  |
| C  | 3.059806000  | -1.221521000 | 2.794798000  |

|   |             |              |              |
|---|-------------|--------------|--------------|
| C | 1.933984000 | -2.382879000 | 0.998406000  |
| C | 2.626896000 | -2.194908000 | 3.697143000  |
| C | 1.508183000 | -3.362962000 | 1.899718000  |
| C | 1.848355000 | -3.269941000 | 3.252641000  |
| H | 3.659797000 | -0.384722000 | 3.163188000  |
| H | 1.682535000 | -2.469158000 | -0.061132000 |
| H | 2.899752000 | -2.116338000 | 4.752096000  |
| H | 0.923930000 | -4.213022000 | 1.538662000  |
| H | 1.523507000 | -4.039225000 | 3.956943000  |
| C | 6.391942000 | 2.269686000  | -2.883937000 |
| H | 7.402319000 | 2.627238000  | -2.609979000 |
| H | 6.476073000 | 1.671570000  | -3.800442000 |
| H | 5.794686000 | 3.174161000  | -3.083674000 |
| C | 5.248826000 | -2.125903000 | -0.738220000 |
| H | 6.014023000 | -2.474582000 | -0.021068000 |
| H | 4.293568000 | -2.544839000 | -0.386139000 |
| H | 5.491337000 | -2.538082000 | -1.726478000 |
| C | 4.576348000 | 2.244445000  | 1.797689000  |
| H | 4.774647000 | 3.323239000  | 1.749032000  |
| H | 3.506537000 | 2.082848000  | 2.012347000  |
| H | 5.136288000 | 1.823369000  | 2.650387000  |

**INT5:**

E = -2126.615067

G = -2126.698534

|   |              |              |              |
|---|--------------|--------------|--------------|
| P | 1.911051000  | 1.067069000  | 0.009244000  |
| N | 2.932442000  | -1.447317000 | -0.608524000 |
| C | 2.270162000  | 1.889624000  | 1.587928000  |
| C | 2.654340000  | 3.168063000  | 1.303434000  |
| C | 2.789517000  | 3.484910000  | -0.152166000 |
| C | 2.511442000  | 2.454177000  | -1.000090000 |
| C | 3.234812000  | -0.254030000 | -0.191657000 |
| C | 4.728221000  | -0.118205000 | 0.107600000  |
| C | 5.295348000  | -1.372355000 | -0.606176000 |
| H | 5.654970000  | -1.085407000 | -1.605363000 |
| H | 6.148792000  | -1.797516000 | -0.061777000 |
| C | 4.149217000  | -2.385964000 | -0.748732000 |
| C | 4.148125000  | -3.080423000 | -2.110569000 |
| H | 5.047427000  | -3.711590000 | -2.166449000 |
| H | 4.194168000  | -2.364190000 | -2.940115000 |
| H | 3.271746000  | -3.730857000 | -2.239699000 |
| C | 4.110459000  | -3.439475000 | 0.365602000  |
| H | 3.227879000  | -4.086766000 | 0.271199000  |
| H | 4.124035000  | -2.996930000 | 1.368495000  |
| H | 5.003137000  | -4.073488000 | 0.265539000  |
| C | 5.386550000  | 1.160787000  | -0.433360000 |
| H | 5.061549000  | 2.051223000  | 0.116381000  |
| H | 5.178984000  | 1.310226000  | -1.502148000 |
| H | 6.476253000  | 1.064933000  | -0.312552000 |
| C | 4.944433000  | -0.180100000 | 1.641938000  |
| H | 6.024095000  | -0.267603000 | 1.834288000  |
| H | 4.449927000  | -1.042559000 | 2.109652000  |
| H | 4.587669000  | 0.736422000  | 2.127179000  |
| C | 1.600372000  | -1.968412000 | -0.864995000 |
| C | 1.096497000  | -1.925123000 | -2.181818000 |
| C | -0.128951000 | -2.560792000 | -2.423011000 |
| H | -0.535836000 | -2.550987000 | -3.437152000 |
| C | -0.828056000 | -3.190372000 | -1.394822000 |
| H | -1.767911000 | -3.703629000 | -1.609390000 |
| C | -0.345742000 | -3.143588000 | -0.088806000 |

|    |              |              |              |
|----|--------------|--------------|--------------|
| H  | -0.928598000 | -3.573802000 | 0.727733000  |
| C  | 0.873957000  | -2.522744000 | 0.212113000  |
| C  | 1.297794000  | -2.430577000 | 1.657046000  |
| H  | 1.600419000  | -3.412063000 | 2.053100000  |
| H  | 2.129158000  | -1.735860000 | 1.824008000  |
| H  | 0.448706000  | -2.082943000 | 2.262871000  |
| C  | 1.769021000  | -1.186823000 | -3.312618000 |
| H  | 2.646331000  | -0.611198000 | -2.995063000 |
| H  | 2.089390000  | -1.877668000 | -4.107664000 |
| H  | 1.057688000  | -0.479772000 | -3.766575000 |
| C  | 1.915832000  | 1.268115000  | 2.907178000  |
| H  | 0.848052000  | 0.993463000  | 2.933946000  |
| H  | 2.484731000  | 0.345702000  | 3.102995000  |
| H  | 2.108489000  | 1.954674000  | 3.742219000  |
| C  | 2.899258000  | 4.242055000  | 2.320427000  |
| H  | 2.790551000  | 3.882854000  | 3.350755000  |
| H  | 3.914449000  | 4.656736000  | 2.210655000  |
| H  | 2.200779000  | 5.082754000  | 2.176757000  |
| C  | 3.198985000  | 4.863293000  | -0.575567000 |
| H  | 4.199244000  | 5.106250000  | -0.179654000 |
| H  | 3.232106000  | 4.979416000  | -1.665452000 |
| H  | 2.509200000  | 5.621225000  | -0.171107000 |
| C  | 2.516874000  | 2.416578000  | -2.498300000 |
| H  | 2.668418000  | 3.416413000  | -2.926427000 |
| H  | 3.320726000  | 1.771182000  | -2.892235000 |
| H  | 1.565606000  | 2.023081000  | -2.890648000 |
| C  | -2.440869000 | 0.470868000  | -0.364114000 |
| C  | -3.250695000 | -0.231859000 | 0.450280000  |
| C  | -4.820185000 | -0.271652000 | 0.159681000  |
| C  | -5.085610000 | -0.666232000 | -1.254484000 |
| C  | -5.355291000 | 1.047953000  | 0.599807000  |
| C  | -5.851229000 | 1.928889000  | -0.340459000 |
| C  | -5.997038000 | 1.550595000  | -1.693626000 |
| C  | -5.629985000 | 0.240720000  | -2.123283000 |
| Au | -0.393935000 | 0.612975000  | -0.238528000 |
| H  | -5.224433000 | -1.053558000 | 0.822714000  |
| H  | -6.179506000 | 2.923997000  | -0.032219000 |
| H  | -5.796735000 | -0.032137000 | -3.168265000 |
| H  | -2.926108000 | 1.004738000  | -1.193617000 |
| C  | -2.820664000 | -0.958724000 | 1.676225000  |
| C  | -3.214050000 | -2.288221000 | 1.918282000  |
| C  | -1.998090000 | -0.326166000 | 2.629130000  |
| C  | -2.777557000 | -2.973271000 | 3.054562000  |
| C  | -1.570462000 | -1.006005000 | 3.773025000  |
| C  | -1.952884000 | -2.333932000 | 3.987780000  |
| H  | -3.851850000 | -2.808529000 | 1.198417000  |
| H  | -1.713048000 | 0.716770000  | 2.473520000  |
| H  | -3.087501000 | -4.008347000 | 3.216874000  |
| H  | -0.949694000 | -0.490000000 | 4.509895000  |
| H  | -1.626957000 | -2.863515000 | 4.885863000  |
| C  | -6.586575000 | 2.494469000  | -2.685150000 |
| H  | -7.583788000 | 2.122048000  | -2.985638000 |
| H  | -6.701644000 | 3.512636000  | -2.291940000 |
| H  | -5.983483000 | 2.518759000  | -3.607731000 |
| C  | -5.344056000 | 1.376862000  | 2.053654000  |
| H  | -6.096818000 | 0.753040000  | 2.568990000  |
| H  | -4.377068000 | 1.130103000  | 2.518376000  |
| H  | -5.585891000 | 2.431053000  | 2.242149000  |
| C  | -4.681010000 | -2.038252000 | -1.677462000 |
| H  | -4.918881000 | -2.237191000 | -2.730649000 |
| H  | -3.595356000 | -2.159585000 | -1.523410000 |

H            -5.178871000            -2.799778000            -1.053461000

**INT6:**

E = -1831.653792

G = -1831.732775

|   |              |              |              |
|---|--------------|--------------|--------------|
| C | 2.294302000  | -0.560931000 | -0.088438000 |
| C | 2.980207000  | 0.590306000  | 0.038381000  |
| H | 2.880915000  | -1.473540000 | -0.263603000 |
| C | 2.363938000  | 1.911391000  | 0.350610000  |
| C | 2.588571000  | 3.037299000  | -0.463105000 |
| C | 1.519403000  | 2.053882000  | 1.469750000  |
| C | 1.970397000  | 4.259114000  | -0.184536000 |
| C | 0.910454000  | 3.279776000  | 1.757336000  |
| C | 1.130577000  | 4.385494000  | 0.928871000  |
| H | 3.239975000  | 2.955940000  | -1.337255000 |
| H | 1.354936000  | 1.193602000  | 2.122262000  |
| H | 2.152565000  | 5.118937000  | -0.833666000 |
| H | 0.277082000  | 3.375564000  | 2.642834000  |
| H | 0.669183000  | 5.348488000  | 1.160949000  |
| C | 4.569979000  | 0.598386000  | -0.101959000 |
| C | 4.984437000  | -0.079372000 | -1.366567000 |
| C | 5.099131000  | 0.025907000  | 1.169175000  |
| C | 5.713819000  | -1.209169000 | 1.154696000  |
| C | 5.987262000  | -1.876833000 | -0.060734000 |
| C | 5.638964000  | -1.280618000 | -1.308858000 |
| H | 4.855896000  | 1.661320000  | -0.158975000 |
| H | 6.035551000  | -1.666924000 | 2.092817000  |
| H | 5.910934000  | -1.801234000 | -2.230333000 |
| C | 6.697636000  | -3.186633000 | -0.060405000 |
| H | 7.727400000  | -3.033004000 | -0.435152000 |
| H | 6.759742000  | -3.639712000 | 0.937384000  |
| H | 6.223270000  | -3.891925000 | -0.761960000 |
| C | 4.951442000  | 0.814247000  | 2.425554000  |
| H | 5.673626000  | 1.651135000  | 2.406065000  |
| H | 3.954992000  | 1.273856000  | 2.506598000  |
| H | 5.154998000  | 0.211559000  | 3.320549000  |
| C | 4.611356000  | 0.566683000  | -2.658608000 |
| H | 4.955648000  | -0.010061000 | -3.526983000 |
| H | 3.515266000  | 0.677766000  | -2.716622000 |
| H | 5.038380000  | 1.582337000  | -2.719512000 |
| P | -2.118232000 | -0.875822000 | -0.115949000 |
| N | -2.501467000 | 1.914703000  | -0.683584000 |
| C | -2.732009000 | -1.686579000 | 1.387748000  |
| C | -3.300569000 | -2.864794000 | 1.007270000  |
| C | -3.420550000 | -3.066077000 | -0.473787000 |
| C | -2.924066000 | -2.052586000 | -1.239676000 |
| C | -3.021085000 | 0.727839000  | -0.280406000 |
| N | -4.313158000 | 0.964065000  | 0.059865000  |
| C | -4.605815000 | 2.309009000  | -0.093935000 |
| C | -3.457315000 | 2.911223000  | -0.564923000 |
| C | -3.196604000 | 4.338096000  | -0.911512000 |
| H | -4.057749000 | 4.958780000  | -0.634644000 |
| H | -3.028794000 | 4.471424000  | -1.993062000 |
| H | -2.315079000 | 4.727095000  | -0.378405000 |
| C | -2.441154000 | -1.148005000 | 2.755571000  |

|    |              |              |              |
|----|--------------|--------------|--------------|
| H  | -2.831579000 | -0.122694000 | 2.880531000  |
| H  | -2.889420000 | -1.770492000 | 3.541652000  |
| H  | -1.355234000 | -1.099588000 | 2.943471000  |
| C  | -3.791576000 | -3.928673000 | 1.942121000  |
| H  | -3.644798000 | -3.665082000 | 2.996573000  |
| H  | -4.864719000 | -4.125782000 | 1.784400000  |
| H  | -3.268721000 | -4.880807000 | 1.755394000  |
| C  | -4.036691000 | -4.325655000 | -1.005164000 |
| H  | -5.054718000 | -4.466668000 | -0.607752000 |
| H  | -4.092678000 | -4.337901000 | -2.100388000 |
| H  | -3.452105000 | -5.204814000 | -0.687407000 |
| C  | -2.846661000 | -1.915979000 | -2.730151000 |
| H  | -3.486345000 | -2.650158000 | -3.238477000 |
| H  | -3.165647000 | -0.913928000 | -3.063280000 |
| H  | -1.814818000 | -2.065043000 | -3.092137000 |
| Au | 0.242388000  | -0.711454000 | -0.110128000 |
| C  | -5.943163000 | 2.895114000  | 0.207857000  |
| H  | -6.261854000 | 2.670745000  | 1.237818000  |
| H  | -5.912696000 | 3.986066000  | 0.097522000  |
| H  | -6.717591000 | 2.515790000  | -0.479128000 |
| C  | -1.150518000 | 2.158370000  | -1.203394000 |
| H  | -0.834303000 | 1.319775000  | -1.832730000 |
| H  | -1.168467000 | 3.065107000  | -1.816062000 |
| H  | -0.437668000 | 2.293067000  | -0.379354000 |
| C  | -5.280041000 | -0.041823000 | 0.506108000  |
| H  | -5.153903000 | -0.247032000 | 1.577661000  |
| H  | -6.292365000 | 0.333640000  | 0.323641000  |
| H  | -5.136214000 | -0.965263000 | -0.065218000 |

**INT7:**

E = -1982.859093

G = -1982.943162

|   |              |              |              |
|---|--------------|--------------|--------------|
| P | -1.898585000 | 0.201257000  | 0.302284000  |
| C | -2.222704000 | 1.839323000  | -0.441737000 |
| C | -1.163831000 | 2.764538000  | -0.474753000 |
| C | -3.481659000 | 2.203910000  | -0.954729000 |
| C | -1.367380000 | 4.039219000  | -1.008598000 |
| C | -3.675370000 | 3.478578000  | -1.491184000 |
| C | -2.619429000 | 4.397565000  | -1.517129000 |
| H | -0.178083000 | 2.498574000  | -0.086898000 |
| H | -4.315850000 | 1.497798000  | -0.939251000 |
| H | -0.537517000 | 4.749170000  | -1.027899000 |
| H | -4.654599000 | 3.758468000  | -1.886543000 |
| H | -2.775423000 | 5.394191000  | -1.936545000 |
| C | -2.582058000 | 0.171344000  | 1.997637000  |
| C | -3.726656000 | 0.909039000  | 2.345939000  |
| C | -1.955968000 | -0.648303000 | 2.952954000  |
| C | -4.248381000 | 0.810124000  | 3.637532000  |
| C | -2.487666000 | -0.745349000 | 4.242349000  |
| C | -3.633432000 | -0.019339000 | 4.583599000  |
| H | -4.204697000 | 1.569613000  | 1.619461000  |
| H | -1.054363000 | -1.208878000 | 2.691305000  |
| H | -5.134238000 | 1.388389000  | 3.910103000  |
| H | -1.999986000 | -1.381518000 | 4.984464000  |
| H | -4.043133000 | -0.089947000 | 5.593969000  |
| C | -3.050264000 | -0.866093000 | -0.604226000 |
| C | -4.000520000 | -1.874531000 | -0.642159000 |
| C | -3.537345000 | -1.272091000 | -1.834700000 |



|    |              |              |              |
|----|--------------|--------------|--------------|
| N  | -3.528130000 | -1.115510000 | -3.136457000 |
| N  | -4.759605000 | -2.728851000 | 0.000274000  |
| C  | -2.634254000 | -0.129418000 | -3.754810000 |
| H  | -2.058475000 | 0.395157000  | -2.982786000 |
| H  | -1.944314000 | -0.635937000 | -4.447606000 |
| H  | -3.226737000 | 0.607959000  | -4.318094000 |
| C  | -4.375517000 | -1.892052000 | -4.042096000 |
| H  | -3.750734000 | -2.481639000 | -4.731279000 |
| H  | -5.019262000 | -2.572259000 | -3.473577000 |
| H  | -5.009854000 | -1.214037000 | -4.633927000 |
| C  | -5.674823000 | -3.645300000 | -0.681731000 |
| H  | -5.588973000 | -3.533586000 | -1.768159000 |
| H  | -5.432321000 | -4.684674000 | -0.411275000 |
| H  | -6.712910000 | -3.435482000 | -0.379494000 |
| C  | -4.739900000 | -2.794573000 | 1.466348000  |
| H  | -5.743479000 | -2.571013000 | 1.860329000  |
| H  | -4.450605000 | -3.806980000 | 1.788211000  |
| H  | -4.027072000 | -2.066522000 | 1.869034000  |
| C  | 2.405212000  | -0.758321000 | -0.044989000 |
| C  | 3.323307000  | 0.223277000  | -0.122582000 |
| C  | 4.869878000  | -0.130899000 | -0.341366000 |
| C  | 5.036046000  | -1.064308000 | -1.492538000 |
| C  | 5.365582000  | -0.601543000 | 0.981647000  |
| C  | 5.708487000  | -1.929551000 | 1.145289000  |
| C  | 5.748209000  | -2.814905000 | 0.046500000  |
| C  | 5.433491000  | -2.354910000 | -1.266588000 |
| Au | 0.376329000  | -0.429539000 | 0.111129000  |
| H  | 5.352920000  | 0.828112000  | -0.586732000 |
| H  | 6.000620000  | -2.296945000 | 2.131572000  |
| H  | 5.523948000  | -3.055042000 | -2.100817000 |
| H  | 2.774224000  | -1.791414000 | -0.114432000 |
| C  | 3.034779000  | 1.677802000  | 0.026149000  |
| C  | 3.434140000  | 2.605661000  | -0.953265000 |
| C  | 2.331220000  | 2.153337000  | 1.150399000  |
| C  | 3.115917000  | 3.959672000  | -0.829774000 |
| C  | 2.023498000  | 3.510851000  | 1.281369000  |
| C  | 2.410154000  | 4.417510000  | 0.289534000  |
| H  | 3.979762000  | 2.264881000  | -1.837402000 |
| H  | 2.034752000  | 1.447734000  | 1.929852000  |
| H  | 3.423050000  | 4.662025000  | -1.608234000 |
| H  | 1.488552000  | 3.862293000  | 2.166966000  |
| H  | 2.178746000  | 5.480088000  | 0.395204000  |
| C  | 6.174983000  | -4.231804000 | 0.229909000  |
| H  | 7.159464000  | -4.376619000 | -0.252661000 |
| H  | 6.261481000  | -4.519617000 | 1.285501000  |
| H  | 5.482531000  | -4.917560000 | -0.285512000 |
| C  | 5.483485000  | 0.381230000  | 2.095762000  |
| H  | 6.329795000  | 1.060065000  | 1.884902000  |
| H  | 4.592518000  | 1.023346000  | 2.168893000  |
| H  | 5.668192000  | -0.106567000 | 3.061892000  |
| C  | 4.703128000  | -0.554477000 | -2.854496000 |
| H  | 4.844605000  | -1.317665000 | -3.630993000 |
| H  | 3.655302000  | -0.209842000 | -2.875968000 |
| H  | 5.328928000  | 0.319844000  | -3.102550000 |
